# Supplementary material
Source: PubMed Central journal article supplement (PMC8536247)
Supplement: mmc1.pdf [file mmc1.pdf]

# THE LANCET

## Global Health

### Supplementary appendix 1

This appendix formed part of the original submission and has been peer reviewed. We post it as supplied by the authors.

Supplement to: Mashe T, Takawira FT, de Oliveira Martins L, et al. Genomic epidemiology and the role of international and regional travel in the SARS-CoV-2 epidemic in Zimbabwe: a retrospective study of routinely collected surveillance data. *Lancet Glob Health* 2021; published online Oct 22. [http://dx.doi.org/10.1016/S2214-109X\(21\)00434-4](http://dx.doi.org/10.1016/S2214-109X(21)00434-4).

## Supplementary Information

### Genomic epidemiology of the SARS-CoV-2 epidemic in Zimbabwe: Role of international travel and regional migration in spread

**Authors:** Tapfumanei Mashe<sup>1</sup>, Faustinos Tatenda Takawira<sup>1</sup>, Leonardo de Oliveira Martins<sup>2</sup>, Muchaneta Gudza-Mugabe<sup>3</sup>, Joconiah Chirenda, PhD<sup>4</sup>, Manes Munyanyi<sup>5</sup>, Blessmore V Chaibva<sup>5</sup>, Andrew Tarupiwa<sup>1</sup>, Hlanai Gumbo<sup>1</sup>, Agnes Juru<sup>1</sup>, Charles Nyagupe<sup>1</sup>, Vurayai Ruhanya<sup>4</sup>, Isaac Phiri<sup>6</sup>, Portia Manangazira<sup>6</sup>, Alexander Goredema<sup>6</sup>, Sydney Danda<sup>6</sup>, Israel Chabata<sup>6</sup>, Janet Jonga<sup>6</sup>, Rutendo Munharira<sup>6</sup>, Kudzai Masunda<sup>7</sup>, Innocent Mukeredzi<sup>7</sup>, Douglas Mangwanya<sup>6</sup>, The COVID-19 Genomics UK (COG-UK) Consortium<sup>9,#</sup>, SARS-CoV-2 Research Group<sup>10,#</sup>, Alex Trotter<sup>2</sup>, Thanh Le Viet<sup>2</sup>, Steven Rudder<sup>2</sup>, Gemma Kay<sup>2</sup>, David Baker<sup>2</sup>, Gaetan Thilliez<sup>2</sup>, Ana Victoria Gutierrez<sup>2</sup>, Justin O'Grady<sup>2</sup>, Maxwell Hove<sup>5</sup>, Sekesai Mutapuri-Zinyowera<sup>1</sup>, Andrew J. Page<sup>2</sup>, Robert A. Kingsley<sup>2,8</sup>, Gibson Mhlanga<sup>6</sup>

#### Affiliations:

1. National Microbiology Reference Laboratory, Ministry of Health and Child Care, Zimbabwe, P.O. Box ST 749, Southerton, Harare, Zimbabwe
2. Quadram Institute Bioscience, Norwich, United Kingdom
3. World Health Organization, Zimbabwe, 82-84 Enterprise Road, Highlands P.O. Box CY 348 Causeway, Harare, Zimbabwe
4. Department of Surgical Sciences, Faculty of Medicine and Health Sciences, University of Zimbabwe
5. Directorate of Pharmacy Services, Ministry of Health and Child Care, Zimbabwe
6. Ministry of Health and Child Care, Zimbabwe
7. Harare City Health Department, Beatrice Road Infectious Diseases Hospital, Harare, Zimbabwe
8. School of Biological Sciences, University of East Anglia, Norwich, United Kingdom
9. <https://www.cogconsortium.uk> # Full list of COG-UK consortium and names and SARS-CoV-2 Research Group affiliations are in the appendix
10. SARS-CoV-2 Research Group

## Supplementary Methods

**Epidemiological analysis.** Nasopharyngeal samples (n=92,299) were collected across Zimbabwe between the 20<sup>th</sup> March and the 16<sup>th</sup> October 2020 (first 210 days of epidemic) were diagnosed routinely at nine local public (7) and private laboratories (2) to various regions affected using previously described PCR methods to confirm positive cases.<sup>1</sup> All SARS Cov-2 positive samples from private and public laboratories were shipped to the National Microbiology Reference Laboratory (NMRL) for biobanking. We recruited all referred samples from the community into our study. Recruitment was at the time of diagnosis. Patient outcome data was obtained from surveillance data submitted to the Ministry of Health and Child Care's (MoHCC) Epidemiology and Disease Control (EDC). During the early days, all deaths, both in-patient and community, were tested for SARS Cov-2 before burial irrespective of cause of death. Sampling was characterised by a period from March 2020 up to the end of October 2020 when the majority of samples were collected from symptomatic and asymptomatic contacts of positive people returning to Zimbabwe. During the period 20<sup>th</sup> March and the 16<sup>th</sup> October 2020 8099 samples gave a positive PCR test. At sampling gender, age and history of recent travel were recorded. Demographic, clinical and laboratory data associated with 8,099 positive cases was collated and analysed using an analytical cross-sectional study design. Specifically, we determined the number of SARS-CoV-2 infections detected on each day since the first case in Zimbabwe, the distribution of detected cases in ten geographical regions of Zimbabwe. Access to these data (and associated clinical samples used for genomic analysis) was through coordination with teams from the Epidemiology and Diseases Control Unit of the Ministry of Health and Child Care of Zimbabwe. Due to the convenience sampling method used and a relatively small subset of positive samples that were successfully genotyped, there is the potential for bias in the demography and analysed genome sequence data. These biases are difficult to quantify.

**Selection of samples for genomic evaluation.** Out of 8099 samples that gave a positive PCR test within the first 210 days, 328 were available for sequencing. Samples that had a cycle threshold (Ct) <30 in the diagnostic PCR test were processed for sequencing. Of these, 156 samples passed quality control as described below and were analysed further.

**RNA extraction.** Samples for whole genome sequencing were processed using the QuantStudio 3 (Applied Biosystems) diagnostic platform. RNA was extracted from nasopharyngeal swab samples using the NucliESNS easyMag (Biomérieux) instrument according to the manufacturer's instructions. Leftover aliquots of the RNA used for real-time PCR detection were transported to Quadram Institute Bioscience, UK, for sequencing. The Ct or take-off value produced by the SARS-CoV-2 assays in the QuantStudio 3 assays were used to determine whether samples needed to be diluted. Dilution of samples based on Ct or take-off value as previously described in the ARTIC protocol.<sup>2</sup>

**ARTIC SARS-CoV-2 multiplex tiling PCR.** cDNA and multiplex PCR reactions were prepared following the ARTIC nCoV-2019 sequencing protocol v2.<sup>2</sup> Dilutions of RNA were prepared when required based on Ct values following the guidelines from the ARTIC protocol.<sup>2</sup> V3 CoV-2 primers ([https://github.com/artic-network/artic-ncov2019/tree/master/primer\\_schemes/nCoV-2019/V3](https://github.com/artic-network/artic-ncov2019/tree/master/primer_schemes/nCoV-2019/V3) last accessed 2021-07-23) were used to perform the multiplex PCR for SARS-CoV-2 according to the ARTIC protocol (Quick, 2020) with minor changes. All samples in the two ARTIC multiplex

PCRs were run for 35 cycles. Odd and even PCR reactions were pooled and cleaned using a 1x SPRI bead clean using KAPA Pure Beads (Roche Catalogue No. 07983298001) according to manufacturer instructions. PCR products were eluted in 30 µl of 10 mM Tris-HCL buffer, pH 7.5. cDNA was quantified using QuantiFluor® ONE dsDNA System (Promega, WI, USA). Libraries were prepared for sequencing on the Illumina platform and sequenced as described previously.<sup>3</sup> All sequence data are available in the GISAID database <https://www.gisaid.org/> (last accessed 2021-07-28) (Supplementary Table 1), and sequence data of SARS-CoV-2 from South Africa was reported previously.<sup>4</sup>

**Sequence analysis and QC.** The raw reads were demultiplexed using bcl2fastq (v2.20) (Illumina Inc.) allowing for zero mismatches in the dual barcodes to produce FASTQ files. The reads were used to generate a consensus sequence for each sample using an open source ARTIC pipeline adapted from <https://github.com/connor-lab/ncov2019-artic-nf> (<https://github.com/quadram-institute-bioscience/ncov2019-artic-nf/tree/qib> last accessed 2021-07-23). Briefly, the reads had adapter sequence was trimmed with TrimGalore (<https://github.com/FelixKrueger/TrimGalore> last accessed 2021-07-23), were aligned to the Wuhan Hu-1 reference genome (accession MN908947.3) using BWA-MEM (v0.7.17),<sup>5</sup> the ARTIC amplicons were trimmed, and a consensus built using iVar (v.1.2).<sup>6</sup> Samples were prepared and sequenced in 96-well plates with one cDNA negative control per 96-well plate and one RNA extraction negative control were included, where applicable. Contaminated samples were removed from analysis. Consensus sequence was defined as passing quality control if greater than 50% of the genome was covered by confident calls and no evidence of contamination in the negative control. This is regarded as the minimum amount of data to be phylogenetically useful. A confident call was defined as having >910x depth of coverage and all other. If the coverage fell below these thresholds, the bases were masked with Ns. Low quality variants are also masked with Ns. The QC threshold for inclusion in the Global Initiative on Sharing All Influenza Data (GISAID) database currently requires that greater than 50% of the genome is covered by confident calls and that there is no evidence of contamination. All sequences passing the QC threshold at the time were submitted to GISAID (Supplementary Table 2), and were also registered in the ENA database under study accessions PRJEB41826 and PRJEB43562, where both raw reads and assembled genomes are available (Supplementary Table 1). The scripts from RONASUB (<https://github.com/happykhan/ronasub> last accessed 2021-07-28) were used to upload raw reads and consensus genomes to ENA based on the tables generated by the ARTIC pipeline described above. All data is therefore openly accessible through ENA and GenBank. The pipeline also generates the metadata file for GISAID submission.

**Clustering and phylogenetic analysis.** PANGO lineages<sup>7</sup> were assigned to each genome using Pangolin v3.0.5 (<https://github.com/cov-lineages/pangolin> last accessed 2021-07-23) with pangolearn timestamped 2021-06-05, with manual refinement for cases with clear phylogenetic clustering (see below). All sequences were aligned against the reference Wuhan Hu-1 using the software uvaia (<https://github.com/quadram-institute-bioscience/uvaia> last accessed 2021-07-23), which was then used to find the closest global sequences from the GISAID database (2021-06-04) to those from Zimbabwe. After excluding identical global sequences with IQTREE2, and manual curation to remove isolated global clusters, 316 global genomes were kept in the phylogenetic analysis. In particular, the manual curation

involved using the software figtree [<http://tree.bio.ed.ac.uk/software/figtree/> last accessed 2021-07-23] to find clusters in the tree composed exclusively of international sequences, which convey the same visual information if replaced by a single leaf. With the list of such visually redundant leaves, the pruning was done with goalign and gotree.<sup>8</sup> The maximum likelihood tree was estimated using fasttree and refined with iqtree2 under the HKY+G model.<sup>9,10</sup> Ancestral genomes were inferred over nodes of interest by empirical Bayesian reconstruction using IQTREE2, in order to find defining substitutions along the tree. The manual refinement of the lineage classification was done for the cases where sequences clustered together were nonetheless assigned distinct lineages according to Pangolin. This is a known issue where ambiguity in sequences leads to classifying them to their parental lineage.<sup>11</sup> Since this ambiguity does not affect the maximum likelihood phylogenetic estimation, visual inspection of all consensus genomes from such conflicting clusters was done with snipit (<https://github.com/aineniameh/snipit> last accessed 2021-07-23). If the disagreement between sequences amounts to ambiguity or singletons (SNPs unique to a single sequence), then we correct the ancestral lineage classification to the refined one (as in B.1.446 being a sublineage of B.1). All manual curation, inspection, and analysis (both Bayesian and under likelihood) were done by the same expert phylogeneticist. The GISAID accession IDs of all sequences used in this study are available under Supplementary Table 2 (sequences on GISAID are available to registered users).

**Bayesian inference of divergence times.** From the alignment above, we excluded all sequences with missing month data and most global sequences with redundant phylogenetic information, keeping 154 Zimbabwe and 83 global sequences. The objective was to keep at least one global sequence in the path between Zimbabwe subtrees. We thus conducted a Bayesian divergence times estimation using BEAST2 (v2.6.2)<sup>12</sup> under an uncorrelated lognormal relaxed clock with a coalescent prior on trees under exponential growth (with default settings). The uncorrelated relaxed molecular disentangles epoch times and genome substitutions by assuming that each branch in the tree has its own evolutionary rate, which comes from an lognormal distribution.<sup>13</sup> The chosen coalescent tree prior reproduces the tree shape and branch lengths of an exponentially growing population, and is a good approximation for viral outbreaks.<sup>14</sup> Both models have been used successfully in SARS-CoV-2 divergence analysis<sup>15</sup>. The posterior distribution was sampled every  $10^4$  steps over  $5 \cdot 10^7$  iterations, and convergence was evaluated with tracer (ESS>400) based on two independent runs. Based on the likelihood traces and convergence of these two runs, an appropriate burnin of 20% of samples was set (using, therefore, 4000 samples from the last  $4 \cdot 10^7$  iterations). The maximum clade credibility tree was thus estimated with treeannotator after discarding the first 20% of each independent run, with branch lengths estimated from the mean MRCA time over all trees. The 95% credible sets for node times were calculated for bipartitions with >50% frequency. The ancestral locations (Zimbabwe or global, based on tip information) were estimated by parsimony with the castor library for R<sup>16</sup>, using the maximum clade credibility tree. We then estimated the set of occurrences of transitions global-Zimbabwe by the parental nodes with their respective divergence times.

## References

1. Corman VM, Landt O, Kaiser M, et al. Detection of 2019 novel coronavirus (2019-nCoV) by real-time RT-PCR. *Eurosurveillance* 2020; **25**(3): 2000045.
2. Quick J. NCoV-2019 Sequencing Protocol V2. April <https://doi.org/10.17504/protocols.io/bdp7i5rn> 2020.
3. Baker DJ, Kay GL, Aydin A, et al. CoronaHiT: large scale multiplexing of SARS-CoV-2 genomes using Nanopore sequencing. *bioRxiv* 2020: 2020.06.24.162156.
4. Msomi N, Mlisana K, de Oliveira T, et al. A genomics network established to respond rapidly to public health threats in South Africa. *The Lancet Microbe* 2020; **1**(6): e229-e30.
5. Li H. Aligning sequence reads, clone sequences and assembly contigs with BWA-MEM. *arXiv preprint arXiv:13033997* 2013.
6. Grubaugh ND, Gangavarapu K, Quick J, et al. An amplicon-based sequencing framework for accurately measuring intrahost virus diversity using PrimalSeq and iVar. *Genome biology* 2019; **20**(1): 1-19.
7. Rambaut A, Holmes EC, Hill V, et al. A dynamic nomenclature proposal for SARS-CoV-2 to assist genomic epidemiology. *bioRxiv* 2020: 2020.04.17.046086.
8. Lemoine F, Gascuel O. Gotree/Goalign : Toolkit and Go API to facilitate the development of phylogenetic workflows. *bioRxiv* 2021: 2021.06.09.447704.
9. Price MN, Dehal PS, Arkin AP. FastTree 2—approximately maximum-likelihood trees for large alignments. *PloS one* 2010; **5**(3): e9490.
10. Minh BQ, Schmidt H, Chernomor O, et al. IQ-TREE 2: New models and efficient methods for phylogenetic inference in the genomic era. *bioRxiv* 2019: 849372.
11. O'Toole Á, Scher E, Underwood A, et al. Assignment of Epidemiological Lineages in an Emerging Pandemic Using the Pangolin Tool. *Virus Evolution* 2021.
12. Bouckaert R, Vaughan TG, Barido-Sottani J, et al. BEAST 2.5: An advanced software platform for Bayesian evolutionary analysis. *PLOS Computational Biology* 2019; **15**(4): e1006650.
13. Drummond AJ, Ho SYW, Phillips MJ, Rambaut A. Relaxed Phylogenetics and Dating with Confidence. *PLOS Biology* 2006; **4**(5): e88.
14. Drummond AJ, Nicholls GK, Rodrigo AG, Solomon W. Estimating Mutation Parameters, Population History and Genealogy Simultaneously From Temporally Spaced Sequence Data. *Genetics* 2002; **161**(3): 1307.
15. Lai A, Bergna A, Acciarri C, Galli M, Zehender G. Early phylogenetic estimate of the effective reproduction number of SARS-CoV-2. *Journal of Medical Virology* 2020; **92**(6): 675-9.
16. Louca S, Doebeli M. Efficient comparative phylogenetics on large trees. *Bioinformatics* 2018; **34**(6): 1053-5.

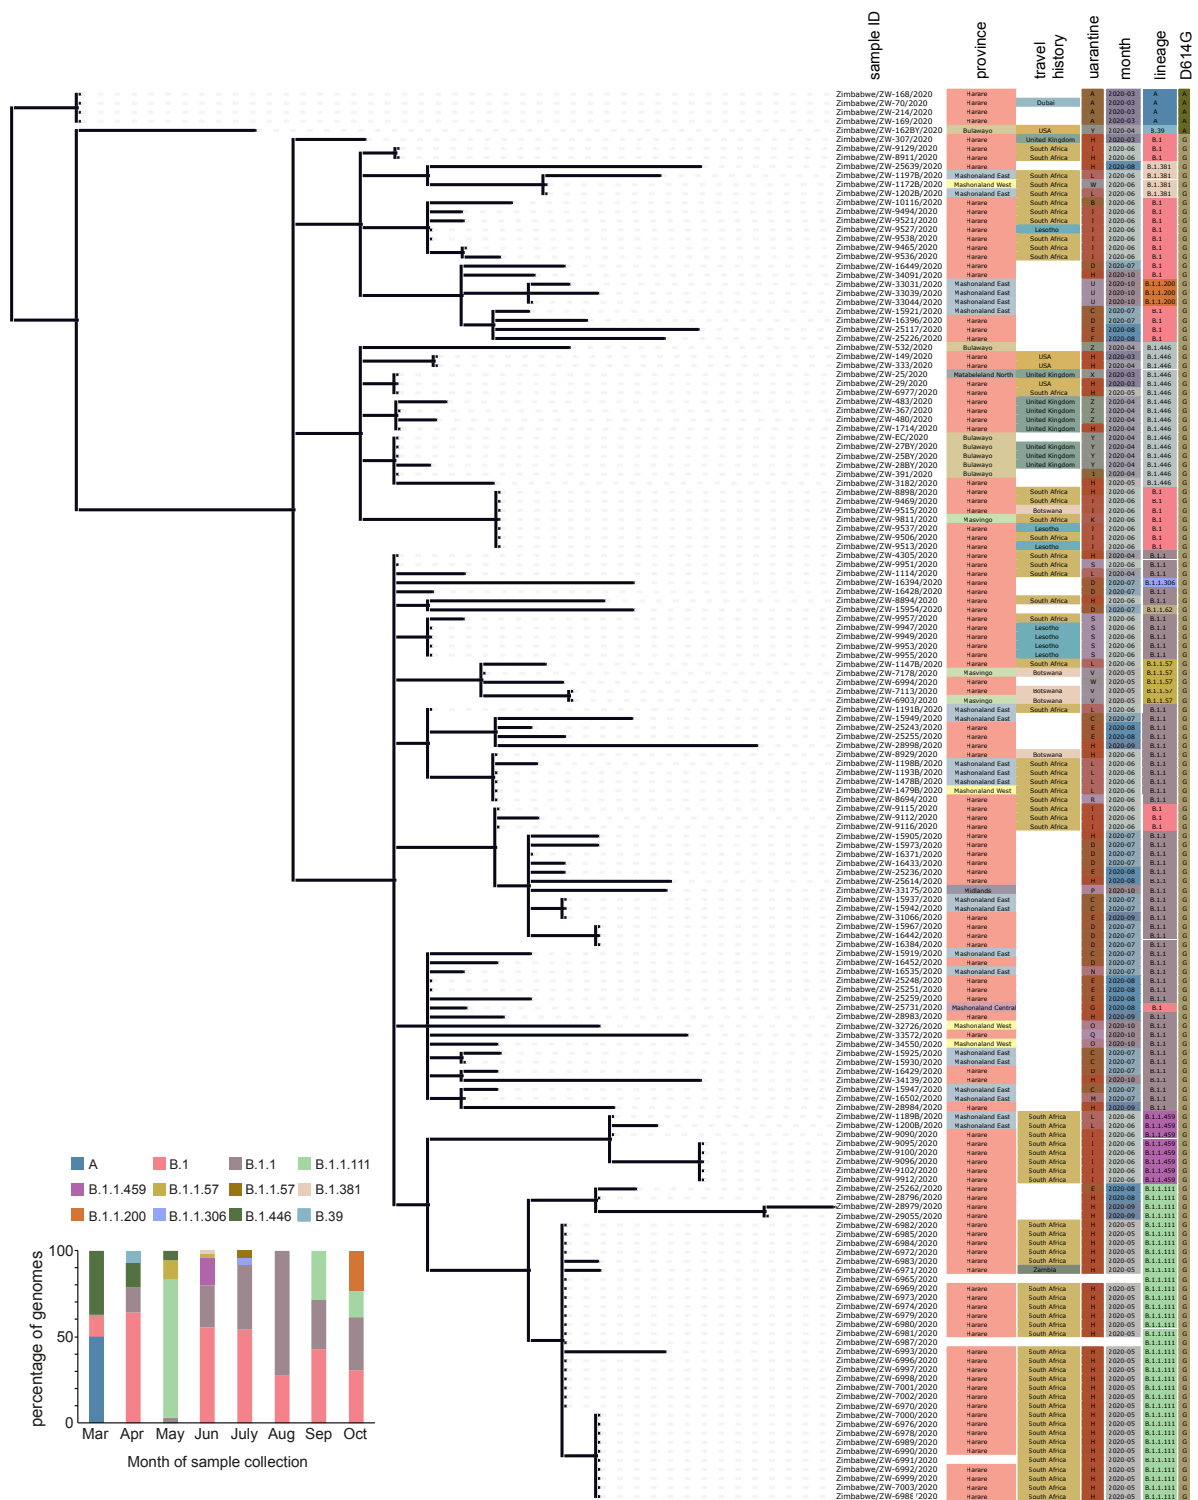

**Supplementary Figure 1. Phylogenetic relationship amongst 156 SARS-Cov-2 samples from Zimbabwe.** A maximum likelihood tree based on SNPs in the genome of 156 SARS-Cov-2 genomes from Zimbabwe from between March and October 2020. Sample Identifier, district and province location from which the sample was collected, country of travel if applicable or domestic case, quarantine facility identity (A-1) or no quarantine (white), month of isolation, SARS-Cov-2 global lineage and residue 614 of the spike 'S' protein are indicated in columns. The proportion of each lineage represented in each month are indicated in the histogram (inset).





**Supplementary Table 1. Genome sequences of SARS-CoV-2 genome sequences determined in this study.**

| Strain                 | Import Country | District    | Province      | collection date | lineage | local    | quarantine | Accession ID    | Project accession | Sample accession |
|------------------------|----------------|-------------|---------------|-----------------|---------|----------|------------|-----------------|-------------------|------------------|
| Zimbabwe/ZW-168/2020   |                | Harare      | Harare        | 01/03/2020      | A       | Local    | A          | EPI_ISL_644743  | ERP125662         | ERS5457043       |
| Zimbabwe/ZW-169/2020   |                | Harare      | Harare        | 01/03/2020      | A       | Local    | A          | EPI_ISL_647976  | ERP125662         | ERS5457070       |
| Zimbabwe/ZW-214/2020   |                | Harare      | Harare        | 01/03/2020      | A       | Local    | A          | EPI_ISL_644764  | ERP125662         | ERS5457073       |
| Zimbabwe/ZW-70/2020    | Dubai          | Harare      | Harare        | 01/03/2020      | A       | Imported | A          | EPI_ISL_644766  | ERP125662         | ERS5457095       |
| Zimbabwe/ZW-10116/2020 | South Africa   | Harare      | Harare        | 01/06/2020      | B.1     | Imported | B          | EPI_ISL_644776  | ERP125662         | ERS5457066       |
| Zimbabwe/ZW-15921/2020 |                | Chitungwiza | Mashonaland E | 27/07/2020      | B.1     | Local    | C          | EPI_ISL_1191784 | ERP127527         | ERS5910351       |
| Zimbabwe/ZW-16396/2020 |                | Harare      | Harare        | 28/07/2020      | B.1     | Local    | D          | EPI_ISL_1191796 | ERP127527         | ERS5910116       |
| Zimbabwe/ZW-16449/2020 |                | Harare      | Harare        | 28/07/2020      | B.1     | Local    | D          | EPI_ISL_1191801 | ERP127527         | ERS5910347       |
| Zimbabwe/ZW-25117/2020 |                | Harare      | Harare        | 14/08/2020      | B.1     | Local    | E          | EPI_ISL_1191805 | ERP127527         | ERS5910241       |
| Zimbabwe/ZW-25226/2020 |                | Harare      | Harare        | 13/08/2020      | B.1     | Local    | F          | EPI_ISL_1191806 | ERP127527         | ERS5910110       |
| Zimbabwe/ZW-25731/2020 |                | Rushinga    | Mashonaland C | 17/08/2020      | B.1     | Local    | G          | EPI_ISL_1191816 | ERP127527         | ERS5910132       |
| Zimbabwe/ZW-28983/2020 |                | Harare      | Harare        | 01/09/2020      | B.1.1   | Local    | H          | EPI_ISL_1191819 | ERP127527         | ERS5910319       |
| Zimbabwe/ZW-28984/2020 |                | Harare      | Harare        | 01/09/2020      | B.1.1   | Local    | H          | EPI_ISL_1191820 | ERP127527         | ERS5910117       |
| Zimbabwe/ZW-34091/2020 |                | Harare      | Harare        | 19/10/2020      | B.1     | Local    | H          | EPI_ISL_1191830 | ERP127527         | ERS5910389       |
| Zimbabwe/ZW-8911/2020  | South Africa   | Harare      | Harare        | 01/06/2020      | B.1     | Imported | H          | EPI_ISL_644747  | ERP125662         | ERS5457021       |
| Zimbabwe/ZW-9112/2020  | South Africa   | Harare      | Harare        | 01/06/2020      | B.1     | Imported | I          | EPI_ISL_644777  | ERP125662         | ERS5457044       |
| Zimbabwe/ZW-9115/2020  | South Africa   | Harare      | Harare        | 01/06/2020      | B.1     | Imported | I          | EPI_ISL_644769  | ERP125662         | ERS5457032       |
| Zimbabwe/ZW-9116/2020  | South Africa   | Harare      | Harare        | 01/06/2020      | B.1     | Imported | I          | EPI_ISL_644778  | ERP125662         | ERS5457065       |
| Zimbabwe/ZW-9129/2020  | South Africa   | Harare      | Harare        | 01/06/2020      | B.1     | Imported | I          | EPI_ISL_644746  | ERP125662         | ERS5457067       |
| Zimbabwe/ZW-9465/2020  | South Africa   | Harare      | Harare        | 01/06/2020      | B.1     | Imported | J          | EPI_ISL_644741  | ERP125662         | ERS5457047       |
| Zimbabwe/ZW-9469/2020  | South Africa   | Harare      | Harare        | 01/06/2020      | B.1     | Imported | J          | EPI_ISL_644745  | ERP125662         | ERS5457074       |
| Zimbabwe/ZW-9494/2020  | South Africa   | Harare      | Harare        | 01/06/2020      | B.1     | Imported | J          | EPI_ISL_644812  | ERP125662         | ERS5457078       |
| Zimbabwe/ZW-9506/2020  | South Africa   | Harare      | Harare        | 01/06/2020      | B.1     | Imported | J          | EPI_ISL_644813  | ERP125662         | ERS5456996       |
| Zimbabwe/ZW-9513/2020  | Lesotho        | Harare      | Harare        | 01/06/2020      | B.1     | Imported | J          | EPI_ISL_644814  | ERP125662         | ERS5457012       |

|                        |              |             |               |            |       |          |   |                 |           |            |
|------------------------|--------------|-------------|---------------|------------|-------|----------|---|-----------------|-----------|------------|
| Zimbabwe/ZW-9515/2020  | Botswana     | Harare      | Harare        | 01/06/2020 | B.1   | Imported | J | EPI_ISL_644761  | ERP125662 | ERS5457010 |
| Zimbabwe/ZW-9521/2020  | South Africa | Harare      | Harare        | 01/06/2020 | B.1   | Imported | J | EPI_ISL_644815  | ERP125662 | ERS5457009 |
| Zimbabwe/ZW-9527/2020  | Lesotho      | Harare      | Harare        | 01/06/2020 | B.1   | Imported | J | EPI_ISL_644816  | ERP125662 | ERS5456997 |
| Zimbabwe/ZW-9536/2020  | South Africa | Harare      | Harare        | 01/06/2020 | B.1   | Imported | J | EPI_ISL_644742  | ERP125662 | ERS5457028 |
| Zimbabwe/ZW-9537/2020  | Lesotho      | Harare      | Harare        | 01/06/2020 | B.1   | Imported | J | EPI_ISL_644771  | ERP125662 | ERS5457033 |
| Zimbabwe/ZW-9538/2020  | South Africa | Harare      | Harare        | 01/06/2020 | B.1   | Imported | J | EPI_ISL_644817  | ERP125662 | ERS5457039 |
| Zimbabwe/ZW-9811/2020  | South Africa | Bikita      | Masvingo      | 01/06/2020 | B.1   | Imported | K | EPI_ISL_644768  | ERP125662 | ERS5457030 |
| Zimbabwe/ZW-1114/2020  | South Africa | Harare      | Harare        | 01/04/2020 | B.1.1 | Imported | L | EPI_ISL_644786  | ERP125662 | ERS5457060 |
| Zimbabwe/ZW-1191B/2020 | South Africa | Chikomba    | Mashonaland E | 01/06/2020 | B.1.1 | Imported | L |                 |           |            |
| Zimbabwe/ZW-1193B/2020 | South Africa | Chikomba    | Mashonaland E | 01/06/2020 | B.1.1 | Imported | L | EPI_ISL_647971  | ERP125662 | ERS5457023 |
| Zimbabwe/ZW-1198B/2020 | South Africa | Chikomba    | Mashonaland E | 01/06/2020 | B.1.1 | Imported | L | EPI_ISL_644775  | ERP125662 | ERS5457022 |
| Zimbabwe/ZW-1478B/2020 | South Africa | Chikomba    | Mashonaland E | 01/06/2020 | B.1.1 | Imported | L | EPI_ISL_647974  | ERP125662 | ERS5457048 |
| Zimbabwe/ZW-1479B/2020 | South Africa | Makonde     | Mashonaland W | 01/06/2020 | B.1.1 | Imported | L | EPI_ISL_647975  | ERP125662 | ERS5457055 |
| Zimbabwe/ZW-15905/2020 |              | Harare      | Harare        | 27/07/2020 | B.1.1 | Local    | H | EPI_ISL_1191782 | ERP127527 | ERS5910181 |
| Zimbabwe/ZW-15919/2020 |              | Chitungwiza | Mashonaland E | 27/07/2020 | B.1.1 | Local    | C | EPI_ISL_1191783 | ERP127527 | ERS5910382 |
| Zimbabwe/ZW-15925/2020 |              | Chitungwiza | Mashonaland E | 27/07/2020 | B.1.1 | Local    | C | EPI_ISL_1191785 | ERP127527 | ERS5910268 |
| Zimbabwe/ZW-15930/2020 |              | Chitungwiza | Mashonaland E | 27/07/2020 | B.1.1 | Local    | C | EPI_ISL_1191786 | ERP127527 | ERS5910190 |
| Zimbabwe/ZW-15937/2020 |              | Chitungwiza | Mashonaland E | 27/07/2020 | B.1.1 | Local    | C | EPI_ISL_1191787 | ERP127527 | ERS5910137 |
| Zimbabwe/ZW-15942/2020 |              | Chitungwiza | Mashonaland E | 27/07/2020 | B.1.1 | Local    | C | EPI_ISL_1191788 | ERP127527 | ERS5910300 |
| Zimbabwe/ZW-15947/2020 |              | Chitungwiza | Mashonaland E | 27/07/2020 | B.1.1 | Local    | C | EPI_ISL_1191789 | ERP127527 | ERS5910196 |
| Zimbabwe/ZW-15949/2020 |              | Chitungwiza | Mashonaland E | 27/07/2020 | B.1.1 | Local    | C | EPI_ISL_1191790 | ERP127527 | ERS5910155 |
| Zimbabwe/ZW-15967/2020 |              | Harare      | Harare        | 27/07/2020 | B.1.1 | Local    | D | EPI_ISL_1191792 | ERP127527 | ERS5910123 |
| Zimbabwe/ZW-15973/2020 |              | Harare      | Harare        | 27/07/2020 | B.1.1 | Local    | D | EPI_ISL_1191793 | ERP127527 | ERS5910236 |
| Zimbabwe/ZW-16371/2020 |              | Harare      | Harare        | 27/07/2020 | B.1.1 | Local    | D | EPI_ISL_1191794 | ERP127527 | ERS5910128 |
| Zimbabwe/ZW-16384/2020 |              | Harare      | Harare        | 28/07/2020 | B.1.1 | Local    | D | EPI_ISL_1195298 | ERP127527 | ERS5910233 |
| Zimbabwe/ZW-16428/2020 |              | Harare      | Harare        | 28/07/2020 | B.1.1 | Local    | D | EPI_ISL_1191797 | ERP127527 | ERS5910138 |
| Zimbabwe/ZW-16429/2020 |              | Harare      | Harare        | 28/07/2020 | B.1.1 | Local    | D | EPI_ISL_1191798 | ERP127527 | ERS5910277 |
| Zimbabwe/ZW-16433/2020 |              | Harare      | Harare        | 28/07/2020 | B.1.1 | Local    | D | EPI_ISL_1191799 | ERP127527 | ERS5910177 |

|                        |              |            |               |            |       |          |   |                 |           |            |
|------------------------|--------------|------------|---------------|------------|-------|----------|---|-----------------|-----------|------------|
| Zimbabwe/ZW-16442/2020 |              | Harare     | Harare        | 28/07/2020 | B.1.1 | Local    | D | EPI_ISL_1191800 | ERP127527 | ERS5910161 |
| Zimbabwe/ZW-16452/2020 |              | Harare     | Harare        | 28/07/2020 | B.1.1 | Local    | D | EPI_ISL_1191802 | ERP127527 | ERS5910144 |
| Zimbabwe/ZW-16502/2020 |              | Uzumbu R P | Mashonaland E | 28/07/2020 | B.1.1 | Local    | M | EPI_ISL_1191803 | ERP127527 | ERS5910371 |
| Zimbabwe/ZW-16535/2020 |              | Mudzi      | Mashonaland E | 28/07/2020 | B.1.1 | Local    | N | EPI_ISL_1191804 | ERP127527 | ERS5910350 |
| Zimbabwe/ZW-25236/2020 |              | Harare     | Harare        | 13/08/2020 | B.1.1 | Local    | E | EPI_ISL_1191807 | ERP127527 | ERS5910385 |
| Zimbabwe/ZW-25243/2020 |              | Harare     | Harare        | 13/08/2020 | B.1.1 | Local    | E | EPI_ISL_1191808 | ERP127527 | ERS5910262 |
| Zimbabwe/ZW-25248/2020 |              | Harare     | Harare        | 13/08/2020 | B.1.1 | Local    | E | EPI_ISL_1191809 | ERP127527 | ERS5910340 |
| Zimbabwe/ZW-25251/2020 |              | Harare     | Harare        | 17/08/2020 | B.1.1 | Local    | E | EPI_ISL_1191810 | ERP127527 | ERS5910398 |
| Zimbabwe/ZW-25255/2020 |              | Harare     | Harare        | 17/08/2020 | B.1.1 | Local    | E | EPI_ISL_1191811 | ERP127527 | ERS5910309 |
| Zimbabwe/ZW-25259/2020 |              | Harare     | Harare        | 17/08/2020 | B.1.1 | Local    | E | EPI_ISL_1191812 | ERP127527 | ERS5910386 |
| Zimbabwe/ZW-25614/2020 |              | Harare     | Harare        | 17/08/2020 | B.1.1 | Local    | H | EPI_ISL_1191814 | ERP127527 | ERS5910145 |
| Zimbabwe/ZW-28998/2020 |              | Harare     | Harare        | 01/09/2020 | B.1.1 | Local    | H | EPI_ISL_1195300 | ERP127527 | ERS5910355 |
| Zimbabwe/ZW-307/2020   | UK           | Harare     | Harare        | 01/03/2020 | B.1   | Imported | H | EPI_ISL_644744  | ERP125662 | ERS5457008 |
| Zimbabwe/ZW-31066/2020 |              | Harare     | Harare        | 13/09/2020 | B.1.1 | Local    | E | EPI_ISL_1191823 | ERP127527 | ERS5910207 |
| Zimbabwe/ZW-32726/2020 |              | Banket     | Mashonaland W | 01/10/2020 | B.1.1 | Local    | O | EPI_ISL_1191824 | ERP127527 | ERS5910301 |
| Zimbabwe/ZW-33175/2020 |              | Kwekwe     | Midlands      | 06/10/2020 | B.1.1 | Local    | P | EPI_ISL_1191828 | ERP127527 | ERS5910250 |
| Zimbabwe/ZW-33572/2020 |              | Harare     | Harare        | 13/10/2020 | B.1.1 | Local    | Q | EPI_ISL_1191829 | ERP127527 | ERS5910113 |
| Zimbabwe/ZW-34139/2020 |              | Harare     | Harare        | 19/10/2020 | B.1.1 | Local    | H | EPI_ISL_1191831 | ERP127527 | ERS5910118 |
| Zimbabwe/ZW-34550/2020 |              | Banket     | Mashonaland W | 19/10/2020 | B.1.1 | Local    | O | EPI_ISL_1191832 | ERP127527 | ERS5910195 |
| Zimbabwe/ZW-4305/2020  | South Africa | Harare     | Harare        | 01/04/2020 | B.1.1 | Imported | H | EPI_ISL_644757  | ERP125662 | ERS5457062 |
| Zimbabwe/ZW-8694/2020  | South Africa | Harare     | Harare        | 01/06/2020 | B.1.1 | Imported | R | EPI_ISL_647983  | ERP125662 | ERS5457011 |
| Zimbabwe/ZW-8894/2020  | South Africa | Harare     | Harare        | 01/06/2020 | B.1.1 | Imported | H | EPI_ISL_644749  | ERP125662 | ERS5457068 |
| Zimbabwe/ZW-8929/2020  | Botswana     | Harare     | Harare        | 01/06/2020 | B.1.1 | Imported | H | EPI_ISL_644739  | ERP125662 | ERS5457063 |
| Zimbabwe/ZW-9947/2020  | Lesotho      | Harare     | Harare        | 01/06/2020 | B.1.1 | Imported | S | EPI_ISL_644818  | ERP125662 | ERS5457059 |
| Zimbabwe/ZW-9949/2020  | Lesotho      | Harare     | Harare        | 01/06/2020 | B.1.1 | Imported | S | EPI_ISL_644819  | ERP125662 | ERS5456998 |
| Zimbabwe/ZW-9951/2020  | South Africa | Harare     | Harare        | 01/06/2020 | B.1.1 | Imported | S | EPI_ISL_644767  | ERP125662 | ERS5457001 |
| Zimbabwe/ZW-9953/2020  | Lesotho      | Harare     | Harare        | 01/06/2020 | B.1.1 | Imported | S | EPI_ISL_644820  | ERP125662 | ERS5457007 |
| Zimbabwe/ZW-9955/2020  | Lesotho      | Harare     | Harare        | 01/06/2020 | B.1.1 | Imported | S | EPI_ISL_644821  | ERP125662 | ERS5457000 |

|                        |              |        |        |            |           |          |   |                 |           |            |
|------------------------|--------------|--------|--------|------------|-----------|----------|---|-----------------|-----------|------------|
| Zimbabwe/ZW-9957/2020  | South Africa | Harare | Harare | 01/06/2020 | B.1.1     | Imported | S | EPI_ISL_644755  | ERP125662 | ERS5457075 |
| Zimbabwe/ZW-25262/2020 |              | Harare | Harare | 17/08/2020 | B.1.1.111 | Local    | E | EPI_ISL_1191813 | ERP127527 | ERS5910254 |
| Zimbabwe/ZW-28796/2020 |              | Harare | Harare | 31/08/2020 | B.1.1.111 | Local    | H | EPI_ISL_1191817 | ERP127527 | ERS5910160 |
| Zimbabwe/ZW-28979/2020 |              | Harare | Harare | 01/09/2020 | B.1.1.111 | Local    | H | EPI_ISL_1191818 | ERP127527 | ERS5910163 |
| Zimbabwe/ZW-29055/2020 |              | Harare | Harare | 01/09/2020 | B.1.1.111 | Local    | H | EPI_ISL_1191822 | ERP127527 | ERS5910271 |
| Zimbabwe/ZW-6965/2020  |              |        |        |            | B.1.1.111 |          |   | EPI_ISL_644790  | ERP125662 | ERS5457025 |
| Zimbabwe/ZW-6969/2020  | South Africa | Harare | Harare | 01/05/2020 | B.1.1.111 | Imported | H | EPI_ISL_644791  | ERP125662 | ERS5457034 |
| Zimbabwe/ZW-6970/2020  | South Africa | Harare | Harare | 01/05/2020 | B.1.1.111 | Imported | H | EPI_ISL_647980  | ERP125662 | ERS5457051 |
| Zimbabwe/ZW-6971/2020  | Zambia       | Harare | Harare | 01/05/2020 | B.1.1.111 | Imported | H | EPI_ISL_644770  | ERP125662 | ERS5457057 |
| Zimbabwe/ZW-6972/2020  | South Africa | Harare | Harare | 01/05/2020 | B.1.1.111 | Imported | H | EPI_ISL_644758  | ERP125662 | ERS5457015 |
| Zimbabwe/ZW-6973/2020  | South Africa | Harare | Harare | 01/05/2020 | B.1.1.111 | Imported | H | EPI_ISL_644792  | ERP125662 | ERS5457038 |
| Zimbabwe/ZW-6974/2020  | South Africa | Harare | Harare | 01/05/2020 | B.1.1.111 | Imported | H | EPI_ISL_644793  | ERP125662 | ERS5457003 |
| Zimbabwe/ZW-6976/2020  | South Africa | Harare | Harare | 01/05/2020 | B.1.1.111 | Imported | H | EPI_ISL_644794  | ERP125662 | ERS5457040 |
| Zimbabwe/ZW-6978/2020  | South Africa | Harare | Harare | 01/05/2020 | B.1.1.111 | Imported | H | EPI_ISL_644795  | ERP125662 | ERS5457082 |
| Zimbabwe/ZW-6979/2020  | South Africa | Harare | Harare | 01/05/2020 | B.1.1.111 | Imported | H | EPI_ISL_644796  | ERP125662 | ERS5457081 |
| Zimbabwe/ZW-6980/2020  | South Africa | Harare | Harare | 01/05/2020 | B.1.1.111 | Imported | H | EPI_ISL_644797  | ERP125662 | ERS5457085 |
| Zimbabwe/ZW-6981/2020  | South Africa | Harare | Harare | 01/05/2020 | B.1.1.111 | Imported | H | EPI_ISL_644798  | ERP125662 | ERS5457086 |
| Zimbabwe/ZW-6982/2020  | South Africa | Harare | Harare | 01/05/2020 | B.1.1.111 | Imported | H | EPI_ISL_644751  | ERP125662 | ERS5457087 |
| Zimbabwe/ZW-6983/2020  | South Africa | Harare | Harare | 01/05/2020 | B.1.1.111 | Imported | H | EPI_ISL_644763  | ERP125662 | ERS5457090 |
| Zimbabwe/ZW-6984/2020  | South Africa | Harare | Harare | 01/05/2020 | B.1.1.111 | Imported | H | EPI_ISL_644756  | ERP125662 | ERS5457084 |
| Zimbabwe/ZW-6985/2020  | South Africa | Harare | Harare | 01/05/2020 | B.1.1.111 | Imported | H | EPI_ISL_644752  | ERP125662 | ERS5457089 |
| Zimbabwe/ZW-6987/2020  |              |        |        |            | B.1.1.111 |          |   | EPI_ISL_644799  | ERP125662 | ERS5457088 |
| Zimbabwe/ZW-6988/2020  | South Africa | Harare | Harare | 01/05/2020 | B.1.1.111 | Imported | H | EPI_ISL_647982  | ERP125662 | ERS5457083 |
| Zimbabwe/ZW-6989/2020  | South Africa | Harare | Harare | 01/05/2020 | B.1.1.111 | Imported | H | EPI_ISL_644800  | ERP125662 | ERS5457016 |
| Zimbabwe/ZW-6990/2020  | South Africa | Harare | Harare | 01/05/2020 | B.1.1.111 | Imported | H | EPI_ISL_644801  | ERP125662 | ERS5457069 |
| Zimbabwe/ZW-6991/2020  | South Africa | Harare | Harare | 01/05/2020 | B.1.1.111 | Imported | H | EPI_ISL_644802  | ERP125662 | ERS5457080 |
| Zimbabwe/ZW-6992/2020  | South Africa | Harare | Harare | 01/05/2020 | B.1.1.111 | Imported | H | EPI_ISL_644803  | ERP125662 | ERS5457026 |
| Zimbabwe/ZW-6993/2020  | South Africa | Harare | Harare | 01/05/2020 | B.1.1.111 | Imported | H | EPI_ISL_644804  | ERP125662 | ERS5457014 |

|                        |              |          |               |            |           |          |   |                 |           |            |
|------------------------|--------------|----------|---------------|------------|-----------|----------|---|-----------------|-----------|------------|
| Zimbabwe/ZW-6996/2020  | South Africa | Harare   | Harare        | 01/05/2020 | B.1.1.111 | Imported | H | EPI_ISL_644805  | ERP125662 | ERS5457005 |
| Zimbabwe/ZW-6997/2020  | South Africa | Harare   | Harare        | 01/05/2020 | B.1.1.111 | Imported | H | EPI_ISL_644806  | ERP125662 | ERS5457013 |
| Zimbabwe/ZW-6998/2020  | South Africa | Harare   | Harare        | 01/05/2020 | B.1.1.111 | Imported | H | EPI_ISL_644807  | ERP125662 | ERS5457024 |
| Zimbabwe/ZW-6999/2020  | South Africa | Harare   | Harare        | 01/05/2020 | B.1.1.111 | Imported | H | EPI_ISL_644808  | ERP125662 | ERS5457046 |
| Zimbabwe/ZW-7000/2020  | South Africa | Harare   | Harare        | 01/05/2020 | B.1.1.111 | Imported | H | EPI_ISL_644762  | ERP125662 | ERS5457036 |
| Zimbabwe/ZW-7001/2020  | South Africa | Harare   | Harare        | 01/05/2020 | B.1.1.111 | Imported | H | EPI_ISL_644809  | ERP125662 | ERS5457076 |
| Zimbabwe/ZW-7002/2020  | South Africa | Harare   | Harare        | 01/05/2020 | B.1.1.111 | Imported | H | EPI_ISL_644810  | ERP125662 | ERS5457017 |
| Zimbabwe/ZW-7003/2020  | South Africa | Harare   | Harare        | 01/05/2020 | B.1.1.111 | Imported | H | EPI_ISL_644811  | ERP125662 | ERS5457045 |
| Zimbabwe/ZW-33031/2020 |              | Ruwa     | Mashonaland E | 05/10/2020 | B.1.1.200 | Local    | U | EPI_ISL_1191825 | ERP127527 | ERS5910151 |
| Zimbabwe/ZW-33039/2020 |              | Ruwa     | Mashonaland E | 06/10/2020 | B.1.1.200 | Local    | U | EPI_ISL_1191826 | ERP127527 | ERS5910226 |
| Zimbabwe/ZW-33044/2020 |              | Ruwa     | Mashonaland E | 06/10/2020 | B.1.1.200 | Local    | U | EPI_ISL_1191827 | ERP127527 | ERS5910152 |
| Zimbabwe/ZW-16394/2020 |              | Harare   | Harare        | 28/07/2020 | B.1.1.306 | Local    | D | EPI_ISL_1191795 | ERP127527 | ERS5910153 |
| Zimbabwe/ZW-1189B/2020 | South Africa | Chikomba | Mashonaland E | 01/06/2020 | B.1.1.459 | Imported | L | EPI_ISL_647970  | ERP125662 | ERS5457020 |
| Zimbabwe/ZW-1200B/2020 | South Africa | Chikomba | Mashonaland E | 01/06/2020 | B.1.1.459 | Imported | L | EPI_ISL_647972  | ERP125662 | ERS5457002 |
| Zimbabwe/ZW-9090/2020  | South Africa | Harare   | Harare        | 01/06/2020 | B.1.1.459 | Imported | I | EPI_ISL_647984  | ERP125662 | ERS5457077 |
| Zimbabwe/ZW-9095/2020  | South Africa | Harare   | Harare        | 01/06/2020 | B.1.1.459 | Imported | I | EPI_ISL_644748  | ERP125662 | ERS5457056 |
| Zimbabwe/ZW-9096/2020  | South Africa | Harare   | Harare        | 01/06/2020 | B.1.1.459 | Imported | I | EPI_ISL_644759  | ERP125662 | ERS5457006 |
| Zimbabwe/ZW-9100/2020  | South Africa | Harare   | Harare        | 01/06/2020 | B.1.1.459 | Imported | I | EPI_ISL_644754  | ERP125662 | ERS5457064 |
| Zimbabwe/ZW-9102/2020  | South Africa | Harare   | Harare        | 01/06/2020 | B.1.1.459 | Imported | I | EPI_ISL_644760  | ERP125662 | ERS5457054 |
| Zimbabwe/ZW-9912/2020  | South Africa | Harare   | Harare        | 01/06/2020 | B.1.1.459 | Imported | I | EPI_ISL_644779  | ERP125662 | ERS5457052 |
| Zimbabwe/ZW-1147B/2020 | South Africa | Harare   | Harare        | 01/06/2020 | B.1.1.57  | Imported | L |                 |           |            |
| Zimbabwe/ZW-6903/2020  | Botswana     | Masvingo | Masvingo      | 01/05/2020 | B.1.1.57  | Imported | V | EPI_ISL_644740  | ERP125662 | ERS5456995 |
| Zimbabwe/ZW-6994/2020  |              | Harare   | Harare        | 01/05/2020 | B.1.1.57  | Local    | W | EPI_ISL_644780  | ERP125662 | ERS5457072 |
| Zimbabwe/ZW-7113/2020  | Botswana     | Harare   | Harare        | 01/05/2020 | B.1.1.57  | Imported | V | EPI_ISL_644738  | ERP125662 | ERS5457027 |
| Zimbabwe/ZW-7178/2020  | Botswana     | Masvingo | Masvingo      | 01/05/2020 | B.1.1.57  | Imported | V | EPI_ISL_644765  | ERP125662 | ERS5457061 |
| Zimbabwe/ZW-15954/2020 |              | Harare   | Harare        | 27/07/2020 | B.1.1.62  | Local    | D | EPI_ISL_1191791 | ERP127527 | ERS5910387 |
| Zimbabwe/ZW-1172B/2020 | South Africa | Chegutu  | West          | 01/06/2020 | B.1.381   | Imported | W | EPI_ISL_644782  | ERP125662 | ERS5457041 |
| Zimbabwe/ZW-1197B/2020 | South Africa | Chikomba | Mashonaland E | 01/06/2020 | B.1.381   | Imported | L |                 |           |            |

|                        |              |          |                |            |         |          |   |                 |           |            |
|------------------------|--------------|----------|----------------|------------|---------|----------|---|-----------------|-----------|------------|
| Zimbabwe/ZW-1202B/2020 | South Africa | Chikomba | Mashonaland E  | 01/06/2020 | B.1.381 | Imported | L | EPI_ISL_647973  | ERP125662 | ERS5457049 |
| Zimbabwe/ZW-25639/2020 |              | Harare   | Harare         | 17/08/2020 | B.1.381 | Local    | H | EPI_ISL_1191815 | ERP127527 | ERS5910215 |
| Zimbabwe/ZW-149/2020   | USA          | Harare   | Harare         | 01/03/2020 | B.1.446 | Imported | H | EPI_ISL_644750  | ERP125662 | ERS5457094 |
| Zimbabwe/ZW-1714/2020  | UK           | Harare   | Harare         | 01/04/2020 | B.1.446 | Imported | H | EPI_ISL_644785  | ERP125662 | ERS5457019 |
| Zimbabwe/ZW-25/2020    | UK           | Hwange   | Matabeleland N | 01/03/2020 | B.1.446 | Imported | X | EPI_ISL_647977  | ERP125662 | ERS5457037 |
| Zimbabwe/ZW-25BY/2020  | UK           | Bulawayo | Bulawayo       | 01/04/2020 | B.1.446 | Imported | Y | EPI_ISL_644787  | ERP125662 | ERS5456999 |
| Zimbabwe/ZW-27BY/2020  | UK           | Bulawayo | Bulawayo       | 01/04/2020 | B.1.446 | Imported | Y | EPI_ISL_644753  | ERP125662 | ERS5457071 |
| Zimbabwe/ZW-28BY/2020  | UK           | Bulawayo | Bulawayo       | 01/04/2020 | B.1.446 | Imported | Y | EPI_ISL_644788  | ERP125662 | ERS5457035 |
| Zimbabwe/ZW-29/2020    | USA          | Harare   | Harare         | 01/03/2020 | B.1.446 | Imported | H | EPI_ISL_647978  | ERP125662 | ERS5457091 |
| Zimbabwe/ZW-3182/2020  |              | Harare   | Harare         | 01/05/2020 | B.1.446 | Local    | H | EPI_ISL_647979  | ERP125662 | ERS5457058 |
| Zimbabwe/ZW-333/2020   | USA          | Harare   | Harare         | 01/04/2020 | B.1.446 | Imported | H | EPI_ISL_644783  | ERP125662 | ERS5457053 |
| Zimbabwe/ZW-367/2020   | UK           | Harare   | Harare         | 01/04/2020 | B.1.446 | Imported | Z | EPI_ISL_644781  | ERP125662 | ERS5457079 |
| Zimbabwe/ZW-391/2020   |              | Bulawayo | Bulawayo       | 01/04/2020 | B.1.446 | Local    | 1 | EPI_ISL_644789  | ERP125662 | ERS5457031 |
| Zimbabwe/ZW-480/2020   | UK           | Harare   | Harare         | 01/04/2020 | B.1.446 | Imported | Z | EPI_ISL_644784  | ERP125662 | ERS5457018 |
| Zimbabwe/ZW-483/2020   | UK           | Harare   | Harare         | 01/04/2020 | B.1.446 | Imported | Z | EPI_ISL_644773  | ERP125662 | ERS5457029 |
| Zimbabwe/ZW-532/2020   |              | Bulawayo | Bulawayo       | 01/04/2020 | B.1.446 | Local    | Z | EPI_ISL_644772  | ERP125662 | ERS5457050 |
| Zimbabwe/ZW-6977/2020  | South Africa | Harare   | Harare         | 01/05/2020 | B.1.446 | Imported | H | EPI_ISL_647981  | ERP125662 | ERS5457042 |
| Zimbabwe/ZW-EC/2020    |              | Bulawayo | Bulawayo       | 01/04/2020 | B.1.446 | Local    | Y | EPI_ISL_644822  | ERP125662 | ERS5457004 |
| Zimbabwe/ZW-8898/2020  | South Africa | Harare   | Harare         | 01/06/2020 | B.1     | Imported | H |                 |           |            |
| Zimbabwe/ZW-162BY/2020 | USA          | Bulawayo | Bulawayo       | 01/04/2020 | B.39    | no data  | Y | EPI_ISL_644774  | ERP125662 | ERS5457092 |

**Supplementary Table 2. Genome sequences used for context and time-scaled phylogenetic analysis.**

| <b>sequence_name</b>      | <b>Continent</b> | <b>country</b> | <b>gisaid_id</b> | <b>lineage</b> | <b>taxa</b>               | <b>zimb</b> |
|---------------------------|------------------|----------------|------------------|----------------|---------------------------|-------------|
| Australia/NSW141/2020     | Oceania          | Australia      | EPI_ISL_427802   | B.1            | Australia/NSW141/2020     | other       |
| Australia/NSW166/2020     | Oceania          | Australia      | EPI_ISL_427771   | B.1.1          | Australia/NSW166/2020     | other       |
| Australia/NSW2171/2020    | Oceania          | Australia      | EPI_ISL_500642   | B.1            | Australia/NSW2171/2020    | other       |
| Australia/VIC07/2020      | Oceania          | Australia      | EPI_ISL_416415   | A              | Australia/VIC07/2020      | other       |
| Australia/VIC199/2020     | Oceania          | Australia      | EPI_ISL_419895   | B.1.1.75       | Australia/VIC199/2020     | other       |
| Australia/VIC353/2020     | Oceania          | Australia      | EPI_ISL_426661   | B.1.1          | Australia/VIC353/2020     | other       |
| Australia/VIC450/2020     | Oceania          | Australia      | EPI_ISL_426746   | B.1            | Australia/VIC450/2020     | other       |
| Australia/VIC473/2020     | Oceania          | Australia      | EPI_ISL_426906   | B.1.1          | Australia/VIC473/2020     | other       |
| Australia/VIC558/2020     | Oceania          | Australia      | EPI_ISL_426819   | B.1            | Australia/VIC558/2020     | other       |
| Australia/VIC559/2020     | Oceania          | Australia      | EPI_ISL_426820   | B.1            | Australia/VIC559/2020     | other       |
| Australia/VIC561/2020     | Oceania          | Australia      | EPI_ISL_426822   | B.1.1          | Australia/VIC561/2020     | other       |
| Australia/VIC603/2020     | Oceania          | Australia      | EPI_ISL_426858   | B.1.1          | Australia/VIC603/2020     | other       |
| Australia/VIC611/2020     | Oceania          | Australia      | EPI_ISL_426865   | B.1            | Australia/VIC611/2020     | other       |
| Australia/VIC658/2020     | Oceania          | Australia      | EPI_ISL_426954   | B.1.1          | Australia/VIC658/2020     | other       |
| Australia/VIC666/2020     | Oceania          | Australia      | EPI_ISL_426962   | B.1            | Australia/VIC666/2020     | other       |
| Australia/VIC674/2020     | Oceania          | Australia      | EPI_ISL_426970   | B.1.1          | Australia/VIC674/2020     | other       |
| Australia/VIC90/2020      | Oceania          | Australia      | EPI_ISL_419801   | B.1.1          | Australia/VIC90/2020      | other       |
| Austria/CeMM0296/2020     | Europe           | Austria        | EPI_ISL_438119   | B.1            | Austria/CeMM0296/2020     | other       |
| Austria/CeMM0368/2020     | Europe           | Austria        | EPI_ISL_475815   | B.1            | Austria/CeMM0368/2020     | other       |
| Austria/CeMM0977/2020     | Europe           | Austria        | EPI_ISL_583822   | B.1.1          | Austria/CeMM0977/2020     | other       |
| Beijing/IVDC-02-06/2020   | Asia             | China          | EPI_ISL_469255   | B.1.1          | Beijing/IVDC-02-06/2020   | other       |
| Belgium/DBWC-0325340/2020 | Europe           | Belgium        | EPI_ISL_462194   | B              | Belgium/DBWC-0325340/2020 | other       |
| Belgium/MAC-0324142/2020  | Europe           | Belgium        | EPI_ISL_420399   | B.1.1          | Belgium/MAC-0324142/2020  | other       |
| Belgium/RT-030460/2020    | Europe           | Belgium        | EPI_ISL_418989   | B.1            | Belgium/RT-030460/2020    | other       |

|                             |                  |                |                |          |                             |       |
|-----------------------------|------------------|----------------|----------------|----------|-----------------------------|-------|
| Belgium/Rega-0328196/2020   | Europe           | Belgium        | EPI_ISL_458166 | B.1      | Belgium/Rega-0328196/2020   | other |
| Belgium/UGent-12/2020       | Europe           | Belgium        | EPI_ISL_419264 | B.1.1.75 | Belgium/UGent-12/2020       | other |
| Belgium/UGent-140/2020      | Europe           | Belgium        | EPI_ISL_481231 | B.1      | Belgium/UGent-140/2020      | other |
| Belgium/UGent-79/2020       | Europe           | Belgium        | EPI_ISL_468729 | B.1      | Belgium/UGent-79/2020       | other |
| Belgium/ULG-10042/2020      | Europe           | Belgium        | EPI_ISL_421209 | B.1.1    | Belgium/ULG-10042/2020      | other |
| Belgium/ULG-10066/2020      | Europe           | Belgium        | EPI_ISL_424629 | B.1.1    | Belgium/ULG-10066/2020      | other |
| Belgium/ULG-10080/2020      | Europe           | Belgium        | EPI_ISL_424641 | B.39     | Belgium/ULG-10080/2020      | other |
| Belgium/reg-a-0409497/2020  | Europe           | Belgium        | EPI_ISL_476949 | B.1.1.75 | Belgium/reg-a-0409497/2020  | other |
| Belgium/reg-a-0912938/2020  | Europe<br>North  | Belgium        | EPI_ISL_734929 | B.1      | Belgium/reg-a-0912938/2020  | other |
| Canada/ON-PHL-20-00233/2020 | America<br>North | Canada         | EPI_ISL_548768 | B.1      | Canada/ON-PHL-20-00233/2020 | other |
| Canada/ON_MU-S328/2020      | America          | Canada         | EPI_ISL_463981 | B.1      | Canada/ON_MU-S328/2020      | other |
| CzechRepublic/IAB_14/2020   | Europe           | Czech Republic | EPI_ISL_426889 | B.1.1    | CzechRepublic/IAB_14/2020   | other |
| Denmark/ALAB-HH20/2020      | Europe           | Denmark        | EPI_ISL_429278 | B.1      | Denmark/ALAB-HH20/2020      | other |
| Denmark/ALAB-SSI-1126/2020  | Europe           | Denmark        | EPI_ISL_436962 | B.1      | Denmark/ALAB-SSI-1126/2020  | other |
| Denmark/ALAB-SSI129/2020    | Europe           | Denmark        | EPI_ISL_429356 | B.1      | Denmark/ALAB-SSI129/2020    | other |
| Denmark/ALAB-SSI414/2020    | Europe           | Denmark        | EPI_ISL_429511 | B.1      | Denmark/ALAB-SSI414/2020    | other |
| Denmark/ALAB-SSI464/2020    | Europe           | Denmark        | EPI_ISL_429545 | B.1      | Denmark/ALAB-SSI464/2020    | other |
| England/200991076/2020      | Europe           | United Kingdom | EPI_ISL_414524 | B.1      | England/200991076/2020      | other |
| England/201160647/2020      | Europe           | United Kingdom | EPI_ISL_464800 | B.1      | England/201160647/2020      | other |
| England/201160756/2020      | Europe           | United Kingdom | EPI_ISL_464803 | B.1      | England/201160756/2020      | other |
| England/20134006704/2020    | Europe           | United Kingdom | EPI_ISL_423072 | B.1.1    | England/20134006704/2020    | other |
| England/201360017/2020      | Europe           | United Kingdom | EPI_ISL_421768 | B.1.1    | England/201360017/2020      | other |
| England/20139060404/2020    | Europe           | United Kingdom | EPI_ISL_420732 | B.1.1    | England/20139060404/2020    | other |
| England/20140007004/2020    | Europe           | United Kingdom | EPI_ISL_423382 | B.1      | England/20140007004/2020    | other |
| England/20140039004/2020    | Europe           | United Kingdom | EPI_ISL_420752 | B.1      | England/20140039004/2020    | other |
| England/20144011404/2020    | Europe           | United Kingdom | EPI_ISL_465977 | B.1.1    | England/20144011404/2020    | other |
| England/ALDP-52B88A/2020    | Europe           | United Kingdom | EPI_ISL_558967 | B.1      | England/ALDP-52B88A/2020    | other |



|                          |        |                |                |         |                          |       |
|--------------------------|--------|----------------|----------------|---------|--------------------------|-------|
| England/ALDP-5CB38B/2020 | Europe | United Kingdom | EPI_ISL_558488 | B.1.1   | England/ALDP-5CB38B/2020 | other |
| England/ALDP-6B81E0/2020 | Europe | United Kingdom | EPI_ISL_557804 | B.1.1   | England/ALDP-6B81E0/2020 | other |
| England/ALDP-8D74A4/2020 | Europe | United Kingdom | EPI_ISL_557045 | B.1.1   | England/ALDP-8D74A4/2020 | other |
| England/ALDP-8FD38D/2020 | Europe | United Kingdom | EPI_ISL_551526 | B.1.1   | England/ALDP-8FD38D/2020 | other |
| England/BIRM-5E7EO/2020  | Europe | United Kingdom | EPI_ISL_444303 | B.3     | England/BIRM-5E7EO/2020  | other |
| England/BIRM-61DBB/2020  | Europe | United Kingdom | EPI_ISL_529393 | B       | England/BIRM-61DBB/2020  | other |
| England/BIRM-61F1F/2020  | Europe | United Kingdom | EPI_ISL_529617 | B.1.1   | England/BIRM-61F1F/2020  | other |
| England/BRIS-1278FB/2020 | Europe | United Kingdom | EPI_ISL_469645 | B.1.1   | England/BRIS-1278FB/2020 | other |
| England/BRIS-12D048/2020 | Europe | United Kingdom | EPI_ISL_481853 | B.1.1   | England/BRIS-12D048/2020 | other |
| England/BRIS-12E223/2020 | Europe | United Kingdom | EPI_ISL_481976 | B.1     | England/BRIS-12E223/2020 | other |
| England/BRIS-12F240/2020 | Europe | United Kingdom | EPI_ISL_488230 | B.1.1   | England/BRIS-12F240/2020 | other |
| England/BRIS-12F671/2020 | Europe | United Kingdom | EPI_ISL_488337 | B.39    | England/BRIS-12F671/2020 | other |
| England/BRIS-1309CF/2020 | Europe | United Kingdom | EPI_ISL_492630 | B.39    | England/BRIS-1309CF/2020 | other |
| England/BRIS-1309DE/2020 | Europe | United Kingdom | EPI_ISL_492719 | B.39    | England/BRIS-1309DE/2020 | other |
| England/CAMB-73062/2020  | Europe | United Kingdom | EPI_ISL_440183 | B.1.610 | England/CAMB-73062/2020  | other |
| England/CAMB-7378B/2020  | Europe | United Kingdom | EPI_ISL_425235 | B.1.1   | England/CAMB-7378B/2020  | other |
| England/CAMB-73ACE/2020  | Europe | United Kingdom | EPI_ISL_425276 | B.1.1   | England/CAMB-73ACE/2020  | other |
| England/CAMB-7477B/2020  | Europe | United Kingdom | EPI_ISL_425333 | B.1     | England/CAMB-7477B/2020  | other |
| England/CAMB-74B42/2020  | Europe | United Kingdom | EPI_ISL_425348 | B.1.1   | England/CAMB-74B42/2020  | other |
| England/CAMB-74E76/2020  | Europe | United Kingdom | EPI_ISL_425381 | B       | England/CAMB-74E76/2020  | other |
| England/CAMB-76FAE/2020  | Europe | United Kingdom | EPI_ISL_425444 | B.1     | England/CAMB-76FAE/2020  | other |
| England/CAMB-7708C/2020  | Europe | United Kingdom | EPI_ISL_425458 | B.1.1   | England/CAMB-7708C/2020  | other |
| England/CAMB-7AAF4/2020  | Europe | United Kingdom | EPI_ISL_433839 | B.1.1   | England/CAMB-7AAF4/2020  | other |
| England/CAMB-7B088/2020  | Europe | United Kingdom | EPI_ISL_433911 | B.1.1   | England/CAMB-7B088/2020  | other |
| England/CAMB-7B1D0/2020  | Europe | United Kingdom | EPI_ISL_433930 | B.1.1   | England/CAMB-7B1D0/2020  | other |
| England/CAMB-7B510/2020  | Europe | United Kingdom | EPI_ISL_433970 | B.1.1   | England/CAMB-7B510/2020  | other |
| England/CAMB-7C6D0/2020  | Europe | United Kingdom | EPI_ISL_442281 | B.1     | England/CAMB-7C6D0/2020  | other |
| England/CAMB-7FB83/2020  | Europe | United Kingdom | EPI_ISL_433484 | B.1.1   | England/CAMB-7FB83/2020  | other |

|                           |        |                |                |           |                           |       |
|---------------------------|--------|----------------|----------------|-----------|---------------------------|-------|
| England/CAMB-8430B/2020   | Europe | United Kingdom | EPI_ISL_443489 | B.1.1     | England/CAMB-8430B/2020   | other |
| England/EXET-135265/2020  | Europe | United Kingdom | EPI_ISL_457040 | B.1       | England/EXET-135265/2020  | other |
| England/EXET-136325/2020  | Europe | United Kingdom | EPI_ISL_457220 | B.1.1     | England/EXET-136325/2020  | other |
| England/EXET-136817/2020  | Europe | United Kingdom | EPI_ISL_457237 | B.1.1.419 | England/EXET-136817/2020  | other |
| England/LIVE-1D26B9/2020  | Europe | United Kingdom | EPI_ISL_534734 | B.1.1     | England/LIVE-1D26B9/2020  | other |
| England/LIVE-A47EB/2020   | Europe | United Kingdom | EPI_ISL_500044 | B.1.1     | England/LIVE-A47EB/2020   | other |
| England/LIVE-A61EB/2020   | Europe | United Kingdom | EPI_ISL_499693 | A         | England/LIVE-A61EB/2020   | other |
| England/LIVE-A9115/2020   | Europe | United Kingdom | EPI_ISL_517263 | B.1       | England/LIVE-A9115/2020   | other |
| England/LOND-124C70E/2020 | Europe | United Kingdom | EPI_ISL_490426 | B.1.612   | England/LOND-124C70E/2020 | other |
| England/LOND-124FAC6/2020 | Europe | United Kingdom | EPI_ISL_664171 | B.1.1     | England/LOND-124FAC6/2020 | other |
| England/LOND-125FC63/2020 | Europe | United Kingdom | EPI_ISL_516836 | B.1       | England/LOND-125FC63/2020 | other |
| England/LOND-1261590/2020 | Europe | United Kingdom | EPI_ISL_524696 | B.1.1     | England/LOND-1261590/2020 | other |
| England/LOND-D38FF/2020   | Europe | United Kingdom | EPI_ISL_441006 | B.39      | England/LOND-D38FF/2020   | other |
| England/LOND-D5022/2020   | Europe | United Kingdom | EPI_ISL_444194 | B.1       | England/LOND-D5022/2020   | other |
| England/LOND-D5189/2020   | Europe | United Kingdom | EPI_ISL_449683 | B.1       | England/LOND-D5189/2020   | other |
| England/LOND-D52B3/2020   | Europe | United Kingdom | EPI_ISL_444205 | B.1       | England/LOND-D52B3/2020   | other |
| England/LOND-D5EEC/2020   | Europe | United Kingdom | EPI_ISL_444259 | B.1       | England/LOND-D5EEC/2020   | other |
| England/LOND-D5F43/2020   | Europe | United Kingdom | EPI_ISL_444265 | B.1       | England/LOND-D5F43/2020   | other |
| England/LOND-D648F/2020   | Europe | United Kingdom | EPI_ISL_487585 | B.1       | England/LOND-D648F/2020   | other |
| England/LOND-D7248/2020   | Europe | United Kingdom | EPI_ISL_478465 | B.1       | England/LOND-D7248/2020   | other |
| England/NORT-281DFF/2020  | Europe | United Kingdom | EPI_ISL_488768 | B.1.1     | England/NORT-281DFF/2020  | other |
| England/NORT-283917/2020  | Europe | United Kingdom | EPI_ISL_488705 | B.39      | England/NORT-283917/2020  | other |
| England/NORT-2839BD/2020  | Europe | United Kingdom | EPI_ISL_488643 | B.1.1     | England/NORT-2839BD/2020  | other |
| England/NORT-294D80/2020  | Europe | United Kingdom | EPI_ISL_488591 | B.1.1     | England/NORT-294D80/2020  | other |
| England/NORT-2959F4/2020  | Europe | United Kingdom | EPI_ISL_478645 | B.1.1     | England/NORT-2959F4/2020  | other |
| England/NORT-297DBA/2020  | Europe | United Kingdom | EPI_ISL_488107 | B.1.1     | England/NORT-297DBA/2020  | other |
| England/NORW-E8B0D/2020   | Europe | United Kingdom | EPI_ISL_448279 | B.1.1     | England/NORW-E8B0D/2020   | other |
| England/NORW-E9E6D/2020   | Europe | United Kingdom | EPI_ISL_448374 | B.1.1     | England/NORW-E9E6D/2020   | other |

|                                  |        |                |                |           |                                  |       |
|----------------------------------|--------|----------------|----------------|-----------|----------------------------------|-------|
| England/NORW-ED82F/2020          | Europe | United Kingdom | EPI_ISL_490499 | B.39      | England/NORW-ED82F/2020          | other |
| England/NORW-EFACD/2020          | Europe | United Kingdom | EPI_ISL_549483 | B.1.1     | England/NORW-EFACD/2020          | other |
| England/NOTT-10E283/2020         | Europe | United Kingdom | EPI_ISL_425519 | B.1       | England/NOTT-10E283/2020         | other |
| England/NOTT-10E2ED/2020         | Europe | United Kingdom | EPI_ISL_425525 | B.1       | England/NOTT-10E2ED/2020         | other |
| England/NOTT-10E5A8/2020         | Europe | United Kingdom | EPI_ISL_425565 | B.1.1     | England/NOTT-10E5A8/2020         | other |
| England/NOTT-10E5B7/2020         | Europe | United Kingdom | EPI_ISL_425566 | B.1.1     | England/NOTT-10E5B7/2020         | other |
| England/NOTT-10E5F3/2020         | Europe | United Kingdom | EPI_ISL_425570 | B.1       | England/NOTT-10E5F3/2020         | other |
| England/OXON-AD6B8/2020          | Europe | United Kingdom | EPI_ISL_448588 | B.1.1     | England/OXON-AD6B8/2020          | other |
| England/OXON-AE23B/2020          | Europe | United Kingdom | EPI_ISL_448675 | B.1.1     | England/OXON-AE23B/2020          | other |
| England/PORT-2D1622/2020         | Europe | United Kingdom | EPI_ISL_512405 | B.1.1.296 | England/PORT-2D1622/2020         | other |
| England/SHEF-BFFA9/2020          | Europe | United Kingdom | EPI_ISL_418317 | B.1.1     | England/SHEF-BFFA9/2020          | other |
| England/SHEF-C02AC/2020          | Europe | United Kingdom | EPI_ISL_420208 | B.1.1     | England/SHEF-C02AC/2020          | other |
| England/SHEF-C6DA5/2020          | Europe | United Kingdom | EPI_ISL_442002 | B.39      | England/SHEF-C6DA5/2020          | other |
| Finland/17A47S12/2020            | Europe | Finland        | EPI_ISL_481578 | B.1       | Finland/17A47S12/2020            | other |
| Finland/17A66S12/2020            | Europe | Finland        | EPI_ISL_481582 | B.1       | Finland/17A66S12/2020            | other |
| Finland/21A16S11/2020            | Europe | Finland        | EPI_ISL_481606 | B.1.490   | Finland/21A16S11/2020            | other |
| Finland/6A962SIIC/2020           | Europe | Finland        | EPI_ISL_481712 | B.1       | Finland/6A962SIIC/2020           | other |
| France/HDF-4220/2020             | Europe | France         | EPI_ISL_428366 | B.1       | France/HDF-4220/2020             | other |
| France/OCC-MP01829/2020          | Europe | France         | EPI_ISL_508909 | B.1.1     | France/OCC-MP01829/2020          | other |
| Germany/BAV-PL-virotum_w09g/2020 | Europe | Germany        | EPI_ISL_887414 | B.1.1     | Germany/BAV-PL-virotum_w09g/2020 | other |
| Germany/BE-ChVir-D710-10/2020    | Europe | Germany        | EPI_ISL_516638 | B.1       | Germany/BE-ChVir-D710-10/2020    | other |
| Germany/BY-ChVir-1017/2020       | Europe | Germany        | EPI_ISL_450209 | B.1       | Germany/BY-ChVir-1017/2020       | other |
| Germany/BY-MVP-0064/2020         | Europe | Germany        | EPI_ISL_437263 | B.1.1.515 | Germany/BY-MVP-0064/2020         | other |
| Germany/BY-MVP-0095/2020         | Europe | Germany        | EPI_ISL_437287 | B.1       | Germany/BY-MVP-0095/2020         | other |
| Ghana/TTH10/2020                 | Africa | Ghana          | EPI_ISL_515182 | A         | Ghana/TTH10/2020                 | other |
| Hungary/SRC-00777/2020           | Europe | Hungary        | EPI_ISL_435417 | B.1.1     | Hungary/SRC-00777/2020           | other |
| Iceland/132/2020                 | Europe | Iceland        | EPI_ISL_417787 | B.1       | Iceland/132/2020                 | other |
| Iceland/504/2020                 | Europe | Iceland        | EPI_ISL_424526 | B.1.1     | Iceland/504/2020                 | other |

|                                    |        |             |                |           |                                    |       |
|------------------------------------|--------|-------------|----------------|-----------|------------------------------------|-------|
| India/HR-TF38/2020                 | Asia   | India       | EPI_ISL_508504 | B.1.1.216 | India/HR-TF38/2020                 | other |
| India/MH-NIV-10380/2020            | Asia   | India       | EPI_ISL_452192 | B.1.1.306 | India/MH-NIV-10380/2020            | other |
| India/MH-NIV-7439/2020             | Asia   | India       | EPI_ISL_452207 | B.1.1.306 | India/MH-NIV-7439/2020             | other |
| Ireland/D-NVRL-AIIDV0073v1/2020    | Europe | Ireland     | EPI_ISL_768758 | B.1.1     | Ireland/D-NVRL-AIIDV0073v1/2020    | other |
| Israel/130710097/2020              | Asia   | Israel      | EPI_ISL_447467 | B.1       | Israel/130710097/2020              | other |
| Israel/130710390/2020              | Asia   | Israel      | EPI_ISL_447461 | B.1       | Israel/130710390/2020              | other |
| Israel/701002403/2020              | Asia   | Israel      | EPI_ISL_447305 | B.1       | Israel/701002403/2020              | other |
| Italy/ABR-IZSGC-TE5674/2020        | Europe | Italy       | EPI_ISL_429228 | B.1.1     | Italy/ABR-IZSGC-TE5674/2020        | other |
| Italy/APU-IZSPB_325PT/2020         | Europe | Italy       | EPI_ISL_653818 | B.1.1     | Italy/APU-IZSPB_325PT/2020         | other |
| Italy/LAZ-INMI17/2020              | Europe | Italy       | EPI_ISL_493329 | B.1       | Italy/LAZ-INMI17/2020              | other |
| Italy/VEN-IZSve-18-48/2020         | Europe | Italy       | EPI_ISL_452184 | B.1       | Italy/VEN-IZSve-18-48/2020         | other |
| Japan/PG-0312/2020                 | Asia   | Japan       | EPI_ISL_479987 | B.1.1     | Japan/PG-0312/2020                 | other |
| Japan/PG-1266/2020                 | Asia   | Japan       | EPI_ISL_684876 | B.1.1     | Japan/PG-1266/2020                 | other |
| Japan/PG-1269/2020                 | Asia   | Japan       | EPI_ISL_684879 | B.1.1     | Japan/PG-1269/2020                 | other |
| Jordan/SR-0336/2020                | Asia   | Jordan      | EPI_ISL_450188 | A         | Jordan/SR-0336/2020                | other |
| Latvia/07/2020                     | Europe | Latvia      | EPI_ISL_426287 | B.59      | Latvia/07/2020                     | other |
| Luxembourg/LNS7866283/2020         | Europe | Luxembourg  | EPI_ISL_419596 | B.1.1     | Luxembourg/LNS7866283/2020         | other |
| Mali/M002616/2020                  | Africa | Mali        | EPI_ISL_487448 | A         | Mali/M002616/2020                  | other |
| Mali/M002675/2020                  | Africa | Mali        | EPI_ISL_487456 | A.21      | Mali/M002675/2020                  | other |
| Mali/M002826/2020                  | Africa | Mali        | EPI_ISL_487465 | A.21      | Mali/M002826/2020                  | other |
| Netherlands/Flevoland_1/2020       | Europe | Netherlands | EPI_ISL_415460 | B.1       | Netherlands/Flevoland_1/2020       | other |
| Netherlands/Haarlem_1363688/2020   | Europe | Netherlands | EPI_ISL_413572 | B.1       | Netherlands/Haarlem_1363688/2020   | other |
| Netherlands/Leiden-0002/2020       | Europe | Netherlands | EPI_ISL_454416 | B.1       | Netherlands/Leiden-0002/2020       | other |
| Netherlands/NA_90/2020             | Europe | Netherlands | EPI_ISL_422850 | B.1       | Netherlands/NA_90/2020             | other |
| Netherlands/Rotterdam_1364740/2020 | Europe | Netherlands | EPI_ISL_413584 | B.1.1     | Netherlands/Rotterdam_1364740/2020 | other |
| Netherlands/Tilburg_1364286/2020   | Europe | Netherlands | EPI_ISL_413587 | B.1.1     | Netherlands/Tilburg_1364286/2020   | other |
| Netherlands/Zeevolde_1365080/2020  | Europe | Netherlands | EPI_ISL_413591 | B.1       | Netherlands/Zeevolde_1365080/2020  | other |
| Oman/RESP-20-2631/2020             | Asia   | Oman        | EPI_ISL_457976 | A         | Oman/RESP-20-2631/2020             | other |

|                                    |        |                |                |          |                                    |       |
|------------------------------------|--------|----------------|----------------|----------|------------------------------------|-------|
| Oman/RESP-20-4736/2020             | Asia   | Oman           | EPI_ISL_457991 | A        | Oman/RESP-20-4736/2020             | other |
| Portugal/IGC4228/2020              | Europe | Portugal       | EPI_ISL_491237 | B.1      | Portugal/IGC4228/2020              | other |
| Portugal/PT0038/2020               | Europe | Portugal       | EPI_ISL_418023 | B.1.1    | Portugal/PT0038/2020               | other |
| Portugal/PT0107/2020               | Europe | Portugal       | EPI_ISL_453823 | B.1.1    | Portugal/PT0107/2020               | other |
| Portugal/PT1507/2020               | Europe | Portugal       | EPI_ISL_511466 | B.1.1    | Portugal/PT1507/2020               | other |
| Russia/CRIE164399/2020             | Europe | Russia         | EPI_ISL_486823 | B.1      | Russia/CRIE164399/2020             | other |
| Russia/Novy_Urengoy-RII24781S/2020 | Europe | Russia         | EPI_ISL_507220 | B.1.1    | Russia/Novy_Urengoy-RII24781S/2020 | other |
| SaudiArabia/KAUST-Madinah270/2020  | Asia   | Saudi Arabia   | EPI_ISL_437752 | B.1      | SaudiArabia/KAUST-Madinah270/2020  | other |
| Scotland/CVR1221/2020              | Europe | United Kingdom | EPI_ISL_438776 | B.1.1    | Scotland/CVR1221/2020              | other |
| Scotland/CVR1922/2020              | Europe | United Kingdom | EPI_ISL_477835 | B.26     | Scotland/CVR1922/2020              | other |
| Scotland/CVR2784/2020              | Europe | United Kingdom | EPI_ISL_473564 | B.1      | Scotland/CVR2784/2020              | other |
| Scotland/CVR91/2020                | Europe | United Kingdom | EPI_ISL_425815 | B.1      | Scotland/CVR91/2020                | other |
| Scotland/EDB022/2020               | Europe | United Kingdom | EPI_ISL_425828 | B.1      | Scotland/EDB022/2020               | other |
| Scotland/EDB085/2020               | Europe | United Kingdom | EPI_ISL_425877 | B.1      | Scotland/EDB085/2020               | other |
| Scotland/EDB1040/2020              | Europe | United Kingdom | EPI_ISL_433377 | B.1      | Scotland/EDB1040/2020              | other |
| Scotland/EDB1679/2020              | Europe | United Kingdom | EPI_ISL_433115 | B.1      | Scotland/EDB1679/2020              | other |
| Scotland/EDB1829/2020              | Europe | United Kingdom | EPI_ISL_433149 | B.1      | Scotland/EDB1829/2020              | other |
| Scotland/EDB1849/2020              | Europe | United Kingdom | EPI_ISL_491623 | B.1      | Scotland/EDB1849/2020              | other |
| Scotland/EDB1992/2020              | Europe | United Kingdom | EPI_ISL_439150 | B.1      | Scotland/EDB1992/2020              | other |
| Scotland/EDB383/2020               | Europe | United Kingdom | EPI_ISL_425990 | B.1.1    | Scotland/EDB383/2020               | other |
| Scotland/EDB4912/2020              | Europe | United Kingdom | EPI_ISL_493922 | B.1      | Scotland/EDB4912/2020              | other |
| Scotland/EDB5242/2020              | Europe | United Kingdom | EPI_ISL_456990 | B.1.1.14 | Scotland/EDB5242/2020              | other |
| Senegal/073/2020                   | Africa | Senegal        | EPI_ISL_418210 | B.1      | Senegal/073/2020                   | other |
| Shanghai/SH0056/2020               | Asia   | China          | EPI_ISL_416364 | B        | Shanghai/SH0056/2020               | other |
| Shanghai/SH0117/2020               | Asia   | China          | EPI_ISL_416403 | A        | Shanghai/SH0117/2020               | other |
| SierraLeone/KGH-G-8603/2020        | Africa | Sierra Leone   | EPI_ISL_512813 | B.1      | SierraLeone/KGH-G-8603/2020        | other |
| Singapore/173/2020                 | Asia   | Singapore      | EPI_ISL_462291 | B.1      | Singapore/173/2020                 | other |
| Singapore/271/2020                 | Asia   | Singapore      | EPI_ISL_462389 | B.1.1    | Singapore/271/2020                 | other |

|                                |        |              |                |           |                                |       |
|--------------------------------|--------|--------------|----------------|-----------|--------------------------------|-------|
| Singapore/831/2020             | Asia   | Singapore    | EPI_ISL_516803 | B.1       | Singapore/831/2020             | other |
| Singapore/974/2020             | Asia   | Singapore    | EPI_ISL_548982 | B.39      | Singapore/974/2020             | other |
| SouthAfrica/KRISP-0088/2020    | Africa | South Africa | EPI_ISL_467457 | B.1       | SouthAfrica/KRISP-0088/2020    | other |
| SouthAfrica/KRISP-0118/2020    | Africa | South Africa | EPI_ISL_467470 | B.1       | SouthAfrica/KRISP-0118/2020    | other |
| SouthAfrica/KRISP-0124/2020    | Africa | South Africa | EPI_ISL_467476 | B.1.1.57  | SouthAfrica/KRISP-0124/2020    | other |
| SouthAfrica/KRISP-0127/2020    | Africa | South Africa | EPI_ISL_467479 | B.1.381   | SouthAfrica/KRISP-0127/2020    | other |
| SouthAfrica/KRISP-0128/2020    | Africa | South Africa | EPI_ISL_467480 | B.1.1.57  | SouthAfrica/KRISP-0128/2020    | other |
| SouthAfrica/KRISP-0130/2020    | Africa | South Africa | EPI_ISL_467482 | B.1.1.57  | SouthAfrica/KRISP-0130/2020    | other |
| SouthAfrica/KRISP-0131/2020    | Africa | South Africa | EPI_ISL_467483 | B.1       | SouthAfrica/KRISP-0131/2020    | other |
| SouthAfrica/KRISP-0135/2020    | Africa | South Africa | EPI_ISL_467487 | B.1.1.57  | SouthAfrica/KRISP-0135/2020    | other |
| SouthAfrica/KRISP-0139/2020    | Africa | South Africa | EPI_ISL_467491 | B.1.1     | SouthAfrica/KRISP-0139/2020    | other |
| SouthAfrica/KRISP-0143/2020    | Africa | South Africa | EPI_ISL_467493 | B.1.1.56  | SouthAfrica/KRISP-0143/2020    | other |
| SouthAfrica/KRISP-0144/2020    | Africa | South Africa | EPI_ISL_467494 | B.1.237   | SouthAfrica/KRISP-0144/2020    | other |
| SouthAfrica/KRISP-0150/2020    | Africa | South Africa | EPI_ISL_467500 | B.1.1.459 | SouthAfrica/KRISP-0150/2020    | other |
| SouthAfrica/KRISP-0386/2020    | Africa | South Africa | EPI_ISL_487329 | B.1.1.62  | SouthAfrica/KRISP-0386/2020    | other |
| SouthAfrica/KRISP-101/2020     | Africa | South Africa | EPI_ISL_455631 | B.1       | SouthAfrica/KRISP-101/2020     | other |
| SouthAfrica/KRISP-K000598/2020 | Africa | South Africa | EPI_ISL_509251 | B.1.1.448 | SouthAfrica/KRISP-K000598/2020 | other |
| SouthAfrica/KRISP-K000601/2020 | Africa | South Africa | EPI_ISL_509254 | B.1.1.57  | SouthAfrica/KRISP-K000601/2020 | other |
| SouthAfrica/KRISP-K001035/2020 | Africa | South Africa | EPI_ISL_509301 | B.1.1.412 | SouthAfrica/KRISP-K001035/2020 | other |
| SouthAfrica/KRISP-K001061/2020 | Africa | South Africa | EPI_ISL_509317 | B.1.1.448 | SouthAfrica/KRISP-K001061/2020 | other |
| SouthAfrica/KRISP-K001064/2020 | Africa | South Africa | EPI_ISL_509320 | B.1.1     | SouthAfrica/KRISP-K001064/2020 | other |
| SouthAfrica/KRISP-K001065/2020 | Africa | South Africa | EPI_ISL_509321 | B.1.1     | SouthAfrica/KRISP-K001065/2020 | other |
| SouthAfrica/KRISP-K001080/2020 | Africa | South Africa | EPI_ISL_509334 | B.1.1     | SouthAfrica/KRISP-K001080/2020 | other |
| SouthAfrica/KRISP-K001098/2020 | Africa | South Africa | EPI_ISL_509347 | B.1.1     | SouthAfrica/KRISP-K001098/2020 | other |
| SouthAfrica/KRISP-K001336/2020 | Africa | South Africa | EPI_ISL_515821 | B.1.1.62  | SouthAfrica/KRISP-K001336/2020 | other |
| SouthAfrica/KRISP-K002185/2020 | Africa | South Africa | EPI_ISL_515584 | B.1.1     | SouthAfrica/KRISP-K002185/2020 | other |
| SouthAfrica/KRISP-K002271/2020 | Africa | South Africa | EPI_ISL_515653 | B.1.1.448 | SouthAfrica/KRISP-K002271/2020 | other |
| SouthAfrica/KRISP-K002289/2020 | Africa | South Africa | EPI_ISL_515667 | B.1.1.34  | SouthAfrica/KRISP-K002289/2020 | other |

|                                   |        |              |                |           |                                   |       |
|-----------------------------------|--------|--------------|----------------|-----------|-----------------------------------|-------|
| SouthAfrica/KRISP-K002329/2020    | Africa | South Africa | EPI_ISL_515705 | B.1.1     | SouthAfrica/KRISP-K002329/2020    | other |
| SouthAfrica/KRISP-K002444/2020    | Africa | South Africa | EPI_ISL_518034 | B.1.1     | SouthAfrica/KRISP-K002444/2020    | other |
| SouthAfrica/KRISP-K002451/2020    | Africa | South Africa | EPI_ISL_518039 | B.1.1     | SouthAfrica/KRISP-K002451/2020    | other |
| SouthAfrica/NHLS-UCT-GP-5156/2020 | Africa | South Africa | EPI_ISL_700454 | B.1.381   | SouthAfrica/NHLS-UCT-GP-5156/2020 | other |
| SouthAfrica/NHLS-UCT-GP-5157/2020 | Africa | South Africa | EPI_ISL_700459 | B.1.381   | SouthAfrica/NHLS-UCT-GP-5157/2020 | other |
| SouthAfrica/NHLS-UCT-GP-5164/2020 | Africa | South Africa | EPI_ISL_700591 | B.1.381   | SouthAfrica/NHLS-UCT-GP-5164/2020 | other |
| SouthAfrica/NHLS-UCT-GP-5256/2020 | Africa | South Africa | EPI_ISL_700471 | B.1.1.459 | SouthAfrica/NHLS-UCT-GP-5256/2020 | other |
| SouthAfrica/NHLS-UCT-GP-5422/2020 | Africa | South Africa | EPI_ISL_700472 | B.1.1     | SouthAfrica/NHLS-UCT-GP-5422/2020 | other |
| SouthAfrica/NHLS-UCT-GP-5482/2020 | Africa | South Africa | EPI_ISL_700503 | B.1.1     | SouthAfrica/NHLS-UCT-GP-5482/2020 | other |
| SouthAfrica/NHLS-UCT-GP-5635/2020 | Africa | South Africa | EPI_ISL_700580 | B.1.381   | SouthAfrica/NHLS-UCT-GP-5635/2020 | other |
| SouthAfrica/NHLS-UCT-GP-5742/2020 | Africa | South Africa | EPI_ISL_700499 | B.1.1.57  | SouthAfrica/NHLS-UCT-GP-5742/2020 | other |
| SouthAfrica/NHLS-UCT-GP-5792/2020 | Africa | South Africa | EPI_ISL_700547 | B.1.1.34  | SouthAfrica/NHLS-UCT-GP-5792/2020 | other |
| SouthAfrica/NHLS-UCT-GP-5818/2020 | Africa | South Africa | EPI_ISL_700473 | B.1.1.459 | SouthAfrica/NHLS-UCT-GP-5818/2020 | other |
| SouthAfrica/NHLS-UCT-GP-5912/2020 | Africa | South Africa | EPI_ISL_700477 | B.1.1.459 | SouthAfrica/NHLS-UCT-GP-5912/2020 | other |
| SouthAfrica/NHLS-UCT-GS-1874/2020 | Africa | South Africa | EPI_ISL_640118 | B.1.381   | SouthAfrica/NHLS-UCT-GS-1874/2020 | other |
| SouthAfrica/NHLS-UCT-GS-2391/2020 | Africa | South Africa | EPI_ISL_960167 | B.1.1.459 | SouthAfrica/NHLS-UCT-GS-2391/2020 | other |
| SouthAfrica/NHLS-UCT-GS-2420/2020 | Africa | South Africa | EPI_ISL_960165 | B.1.1.34  | SouthAfrica/NHLS-UCT-GS-2420/2020 | other |
| SouthAfrica/NHLS-UCT-GS-2980/2020 | Africa | South Africa | EPI_ISL_700574 | B.1.1.34  | SouthAfrica/NHLS-UCT-GS-2980/2020 | other |
| SouthAfrica/NHLS-UCT-GS-3097/2020 | Africa | South Africa | EPI_ISL_700491 | B.1.1.57  | SouthAfrica/NHLS-UCT-GS-3097/2020 | other |
| SouthAfrica/UFS-VIRO-NGS-11/2020  | Africa | South Africa | EPI_ISL_682324 | B.1.1     | SouthAfrica/UFS-VIRO-NGS-11/2020  | other |
| Sweden/20-06761/2020              | Europe | Sweden       | EPI_ISL_455100 | B.1.1     | Sweden/20-06761/2020              | other |
| Sweden/20-06805/2020              | Europe | Sweden       | EPI_ISL_445227 | B.1       | Sweden/20-06805/2020              | other |
| Sweden/20-06883/2020              | Europe | Sweden       | EPI_ISL_434658 | B.1       | Sweden/20-06883/2020              | other |
| Sweden/20-07010/2020              | Europe | Sweden       | EPI_ISL_434661 | B.1       | Sweden/20-07010/2020              | other |
| Sweden/20-07041/2020              | Europe | Sweden       | EPI_ISL_450812 | B.1       | Sweden/20-07041/2020              | other |
| Sweden/20-07298/2020              | Europe | Sweden       | EPI_ISL_434667 | B.1.1     | Sweden/20-07298/2020              | other |
| Sweden/20-07480/2020              | Europe | Sweden       | EPI_ISL_434673 | B.1.1     | Sweden/20-07480/2020              | other |
| Sweden/20-08362/2020              | Europe | Sweden       | EPI_ISL_476142 | B.1       | Sweden/20-08362/2020              | other |

|                                 |                  |             |                |           |                                 |       |
|---------------------------------|------------------|-------------|----------------|-----------|---------------------------------|-------|
| Sweden/20-50144/2020            | Europe           | Sweden      | EPI_ISL_454884 | B.1       | Sweden/20-50144/2020            | other |
| Sweden/20-50370/2020            | Europe           | Sweden      | EPI_ISL_475137 | B.1       | Sweden/20-50370/2020            | other |
| Sweden/20-50659/2020            | Europe           | Sweden      | EPI_ISL_475152 | B.1       | Sweden/20-50659/2020            | other |
| Sweden/20-51755/2020            | Europe           | Sweden      | EPI_ISL_475528 | B.1.1.458 | Sweden/20-51755/2020            | other |
| Switzerland/TI-ETHZ-100182/2020 | Europe           | Switzerland | EPI_ISL_574960 | B.1.1     | Switzerland/TI-ETHZ-100182/2020 | other |
| Taiwan/CGMH-CGU-20/2020         | Asia             | Taiwan      | EPI_ISL_424978 | B.1.1     | Taiwan/CGMH-CGU-20/2020         | other |
| Thailand/Bangkok-0020/2020      | Asia             | Thailand    | EPI_ISL_423041 | B.1       | Thailand/Bangkok-0020/2020      | other |
| USA/CA-ALSR-0571-IPL/2020       | America<br>North | USA         | EPI_ISL_483231 | B.1.243   | USA/CA-ALSR-0571-IPL/2020       | other |
| USA/CA-ALSR-1558/2020           | America<br>North | USA         | EPI_ISL_494660 | B.1.243   | USA/CA-ALSR-1558/2020           | other |
| USA/CA-CZB-1488/2020            | America<br>North | USA         | EPI_ISL_468438 | B.1.1     | USA/CA-CZB-1488/2020            | other |
| USA/CA-QDX-158/2020             | America<br>North | USA         | EPI_ISL_467820 | B.1       | USA/CA-QDX-158/2020             | other |
| USA/CA-QDX-159/2020             | America<br>North | USA         | EPI_ISL_467821 | B.1       | USA/CA-QDX-159/2020             | other |
| USA/CA-SR017/2020               | America<br>North | USA         | EPI_ISL_429991 | B.1.1     | USA/CA-SR017/2020               | other |
| USA/CA-SR0176/2020              | America<br>North | USA         | EPI_ISL_435474 | B.1       | USA/CA-SR0176/2020              | other |
| USA/CA-SR0410/2020              | America<br>North | USA         | EPI_ISL_458280 | B.1.1     | USA/CA-SR0410/2020              | other |
| USA/CT-UW-4343/2020             | America<br>North | USA         | EPI_ISL_430944 | B.1       | USA/CT-UW-4343/2020             | other |
| USA/CT-UW256/2020               | America<br>North | USA         | EPI_ISL_418041 | B.1       | USA/CT-UW256/2020               | other |
| USA/DC-HP00122/2020             | America<br>North | USA         | EPI_ISL_457814 | B.1       | USA/DC-HP00122/2020             | other |
| USA/FL-BPHL-0424/2020           | America<br>North | USA         | EPI_ISL_495330 | B.1       | USA/FL-BPHL-0424/2020           | other |
| USA/FL_7169/2020                | America<br>North | USA         | EPI_ISL_424855 | B.1.110   | USA/FL_7169/2020                | other |
| USA/MI-MDHHS-SC20109/2020       | America<br>North | USA         | EPI_ISL_436885 | B.1       | USA/MI-MDHHS-SC20109/2020       | other |
| USA/MI-MDHHS-SC20230/2020       | America          | USA         | EPI_ISL_447200 | B.1       | USA/MI-MDHHS-SC20230/2020       | other |



|                                |                  |     |                |         |                                |       |
|--------------------------------|------------------|-----|----------------|---------|--------------------------------|-------|
| USA/MI-MDHHS-SC21355/2020      | North<br>America | USA | EPI_ISL_507609 | B.1     | USA/MI-MDHHS-SC21355/2020      | other |
| USA/MI-QDX-385/2020            | North<br>America | USA | EPI_ISL_571127 | B.1     | USA/MI-QDX-385/2020            | other |
| USA/MI-QDX-616/2020            | North<br>America | USA | EPI_ISL_571345 | B.1     | USA/MI-QDX-616/2020            | other |
| USA/MN48-MDH48/2020            | North<br>America | USA | EPI_ISL_417495 | B.1     | USA/MN48-MDH48/2020            | other |
| USA/NY-NYCPLH-000226/2020      | North<br>America | USA | EPI_ISL_631755 | B.1     | USA/NY-NYCPLH-000226/2020      | other |
| USA/NY-NYCPLH-000540/2020      | North<br>America | USA | EPI_ISL_632000 | B.1     | USA/NY-NYCPLH-000540/2020      | other |
| USA/NY-NYUMC349/2020           | North<br>America | USA | EPI_ISL_430376 | B.1.1   | USA/NY-NYUMC349/2020           | other |
| USA/NY-NYUMC41/2020            | North<br>America | USA | EPI_ISL_419702 | B.1     | USA/NY-NYUMC41/2020            | other |
| USA/NY-NYUMC524/2020           | North<br>America | USA | EPI_ISL_444641 | B.1     | USA/NY-NYUMC524/2020           | other |
| USA/NY-NYUMC797/2020           | North<br>America | USA | EPI_ISL_456033 | B.1     | USA/NY-NYUMC797/2020           | other |
| USA/NY-WCMP11E04P/2020         | North<br>America | USA | EPI_ISL_427592 | B.1     | USA/NY-WCMP11E04P/2020         | other |
| USA/NY-Wadsworth-42340-01/2020 | North<br>America | USA | EPI_ISL_525662 | B.1     | USA/NY-Wadsworth-42340-01/2020 | other |
| USA/OR-PROV-059/2020           | North<br>America | USA | EPI_ISL_482339 | B.1     | USA/OR-PROV-059/2020           | other |
| USA/PA-MGSC48-05/2020          | North<br>America | USA | EPI_ISL_436496 | B.1.1   | USA/PA-MGSC48-05/2020          | other |
| USA/TX-HMH0124/2020            | North<br>America | USA | EPI_ISL_434824 | B.1.320 | USA/TX-HMH0124/2020            | other |
| USA/VA-DCLS-0550/2020          | North<br>America | USA | EPI_ISL_485851 | B.1.1   | USA/VA-DCLS-0550/2020          | other |
| USA/WA-S350/2020               | North<br>America | USA | EPI_ISL_434110 | B.1     | USA/WA-S350/2020               | other |
| USA/WA-UW-1575/2020            | North<br>America | USA | EPI_ISL_424172 | B.1     | USA/WA-UW-1575/2020            | other |
| USA/WA-UW-1722/2020            | North<br>America | USA | EPI_ISL_424234 | B.1     | USA/WA-UW-1722/2020            | other |
| USA/WA-UW-1724/2020            | North<br>America | USA | EPI_ISL_424229 | B.1.371 | USA/WA-UW-1724/2020            | other |

|                         |                           |                |                |          |                         |       |
|-------------------------|---------------------------|----------------|----------------|----------|-------------------------|-------|
| USA/WA-UW-1739/2020     | North<br>America<br>North | USA            | EPI_ISL_424237 | B.1      | USA/WA-UW-1739/2020     | other |
| USA/WA-UW-1750/2020     | North<br>America<br>North | USA            | EPI_ISL_424239 | B.1      | USA/WA-UW-1750/2020     | other |
| USA/WA-UW-1797/2020     | North<br>America<br>North | USA            | EPI_ISL_424259 | B.1.371  | USA/WA-UW-1797/2020     | other |
| USA/WA-UW-1801/2020     | North<br>America<br>North | USA            | EPI_ISL_424251 | B.1.371  | USA/WA-UW-1801/2020     | other |
| USA/WA-UW-2245/2020     | North<br>America<br>North | USA            | EPI_ISL_426128 | B.1      | USA/WA-UW-2245/2020     | other |
| USA/WA-UW-2700/2020     | North<br>America<br>North | USA            | EPI_ISL_486016 | B.1.333  | USA/WA-UW-2700/2020     | other |
| USA/WA-UW-2743/2020     | North<br>America<br>North | USA            | EPI_ISL_486025 | B.1.446  | USA/WA-UW-2743/2020     | other |
| USA/WA-UW108/2020       | North<br>America<br>North | USA            | EPI_ISL_416646 | B.39     | USA/WA-UW108/2020       | other |
| USA/WA-UW332/2020       | North<br>America<br>North | USA            | EPI_ISL_418899 | A.1      | USA/WA-UW332/2020       | other |
| USA/WI-WSLH-200059/2020 | North<br>America<br>North | USA            | EPI_ISL_471224 | B.1      | USA/WI-WSLH-200059/2020 | other |
| Wales/ALDP-952D4B/2020  | Europe                    | United Kingdom | EPI_ISL_892235 | B.1.1.59 | Wales/ALDP-952D4B/2020  | other |
| Wales/PHWC-160ED6/2020  | Europe                    | United Kingdom | EPI_ISL_493977 | B.1.35   | Wales/PHWC-160ED6/2020  | other |
| Wales/PHWC-163BBE/2020  | Europe                    | United Kingdom | EPI_ISL_474052 | B.1.44   | Wales/PHWC-163BBE/2020  | other |
| Wales/PHWC-1686A9/2020  | Europe                    | United Kingdom | EPI_ISL_494270 | B.1.1    | Wales/PHWC-1686A9/2020  | other |
| Wales/PHWC-1687B5/2020  | Europe                    | United Kingdom | EPI_ISL_494286 | B.1.1    | Wales/PHWC-1687B5/2020  | other |
| Wales/PHWC-26444/2020   | Europe                    | United Kingdom | EPI_ISL_422102 | B.1.1    | Wales/PHWC-26444/2020   | other |
| Wales/PHWC-26480/2020   | Europe                    | United Kingdom | EPI_ISL_422191 | B.1      | Wales/PHWC-26480/2020   | other |
| Wales/PHWC-26954/2020   | Europe                    | United Kingdom | EPI_ISL_422074 | B.1      | Wales/PHWC-26954/2020   | other |
| Wales/PHWC-26C00/2020   | Europe                    | United Kingdom | EPI_ISL_422103 | B.1.1    | Wales/PHWC-26C00/2020   | other |
| Wales/PHWC-26D58/2020   | Europe                    | United Kingdom | EPI_ISL_422035 | B.1      | Wales/PHWC-26D58/2020   | other |
| Wales/PHWC-26F43/2020   | Europe                    | United Kingdom | EPI_ISL_422144 | B.1      | Wales/PHWC-26F43/2020   | other |
| Wales/PHWC-274AD/2020   | Europe                    | United Kingdom | EPI_ISL_432282 | B.1      | Wales/PHWC-274AD/2020   | other |
| Wales/PHWC-2B782/2020   | Europe                    | United Kingdom | EPI_ISL_445759 | B.1.489  | Wales/PHWC-2B782/2020   | other |
| Wuhan/0126-C77/2020     | Asia                      | China          | EPI_ISL_493178 | B        | Wuhan/0126-C77/2020     | other |

|                        |        |          |                 |           |                        |       |
|------------------------|--------|----------|-----------------|-----------|------------------------|-------|
| Wuhan/0126-C93/2020    | Asia   | China    | EPI_ISL_493179  | B         | Wuhan/0126-C93/2020    | other |
| Wuhan/HB-WH3-191/2020  | Asia   | China    | EPI_ISL_454947  | B         | Wuhan/HB-WH3-191/2020  | other |
| Wuhan/WH04/2020        | Asia   | China    | EPI_ISL_406801  | A         | Wuhan/WH04/2020        | other |
| Zimbabwe/ZW-10116/2020 | Africa | Zimbabwe | EPI_ISL_644776  | B.1       | Zimbabwe/ZW-10116/2020 | ZW    |
| Zimbabwe/ZW-1114/2020  | Africa | Zimbabwe | EPI_ISL_644786  | B.1.1     | Zimbabwe/ZW-1114/2020  | ZW    |
| Zimbabwe/ZW-1147B/2020 | Africa | Zimbabwe |                 | B.1.1.57  | Zimbabwe/ZW-1147B/2020 | ZW    |
| Zimbabwe/ZW-1172B/2020 | Africa | Zimbabwe | EPI_ISL_644782  | B.1.381   | Zimbabwe/ZW-1172B/2020 | ZW    |
| Zimbabwe/ZW-1189B/2020 | Africa | Zimbabwe | EPI_ISL_647970  | B.1.1.459 | Zimbabwe/ZW-1189B/2020 | ZW    |
| Zimbabwe/ZW-1191B/2020 | Africa | Zimbabwe |                 | B.1.1     | Zimbabwe/ZW-1191B/2020 | ZW    |
| Zimbabwe/ZW-1193B/2020 | Africa | Zimbabwe | EPI_ISL_647971  | B.1.1     | Zimbabwe/ZW-1193B/2020 | ZW    |
| Zimbabwe/ZW-1197B/2020 | Africa | Zimbabwe |                 | B.1.381   | Zimbabwe/ZW-1197B/2020 | ZW    |
| Zimbabwe/ZW-1198B/2020 | Africa | Zimbabwe | EPI_ISL_644775  | B.1.1     | Zimbabwe/ZW-1198B/2020 | ZW    |
| Zimbabwe/ZW-1200B/2020 | Africa | Zimbabwe | EPI_ISL_647972  | B.1.1.459 | Zimbabwe/ZW-1200B/2020 | ZW    |
| Zimbabwe/ZW-1202B/2020 | Africa | Zimbabwe | EPI_ISL_647973  | B.1.381   | Zimbabwe/ZW-1202B/2020 | ZW    |
| Zimbabwe/ZW-1478B/2020 | Africa | Zimbabwe | EPI_ISL_647974  | B.1.1     | Zimbabwe/ZW-1478B/2020 | ZW    |
| Zimbabwe/ZW-1479B/2020 | Africa | Zimbabwe | EPI_ISL_647975  | B.1.1     | Zimbabwe/ZW-1479B/2020 | ZW    |
| Zimbabwe/ZW-149/2020   | Africa | Zimbabwe | EPI_ISL_644750  | B.1.446   | Zimbabwe/ZW-149/2020   | ZW    |
| Zimbabwe/ZW-15905/2020 | Africa | Zimbabwe | EPI_ISL_1191782 | B.1.1     | Zimbabwe/ZW-15905/2020 | ZW    |
| Zimbabwe/ZW-15919/2020 | Africa | Zimbabwe | EPI_ISL_1191783 | B.1.1     | Zimbabwe/ZW-15919/2020 | ZW    |
| Zimbabwe/ZW-15921/2020 | Africa | Zimbabwe | EPI_ISL_1191784 | B.1       | Zimbabwe/ZW-15921/2020 | ZW    |
| Zimbabwe/ZW-15925/2020 | Africa | Zimbabwe | EPI_ISL_1191785 | B.1.1     | Zimbabwe/ZW-15925/2020 | ZW    |
| Zimbabwe/ZW-15930/2020 | Africa | Zimbabwe | EPI_ISL_1191786 | B.1.1     | Zimbabwe/ZW-15930/2020 | ZW    |
| Zimbabwe/ZW-15937/2020 | Africa | Zimbabwe | EPI_ISL_1191787 | B.1.1     | Zimbabwe/ZW-15937/2020 | ZW    |
| Zimbabwe/ZW-15942/2020 | Africa | Zimbabwe | EPI_ISL_1191788 | B.1.1     | Zimbabwe/ZW-15942/2020 | ZW    |
| Zimbabwe/ZW-15947/2020 | Africa | Zimbabwe | EPI_ISL_1191789 | B.1.1     | Zimbabwe/ZW-15947/2020 | ZW    |
| Zimbabwe/ZW-15949/2020 | Africa | Zimbabwe | EPI_ISL_1191790 | B.1.1     | Zimbabwe/ZW-15949/2020 | ZW    |
| Zimbabwe/ZW-15954/2020 | Africa | Zimbabwe | EPI_ISL_1191791 | B.1.1.62  | Zimbabwe/ZW-15954/2020 | ZW    |
| Zimbabwe/ZW-15967/2020 | Africa | Zimbabwe | EPI_ISL_1191792 | B.1.1     | Zimbabwe/ZW-15967/2020 | ZW    |

|                        |        |          |                 |           |                        |    |
|------------------------|--------|----------|-----------------|-----------|------------------------|----|
| Zimbabwe/ZW-15973/2020 | Africa | Zimbabwe | EPI_ISL_1191793 | B.1.1     | Zimbabwe/ZW-15973/2020 | ZW |
| Zimbabwe/ZW-162BY/2020 | Africa | Zimbabwe | EPI_ISL_644774  | B.39      | Zimbabwe/ZW-162BY/2020 | ZW |
| Zimbabwe/ZW-16371/2020 | Africa | Zimbabwe | EPI_ISL_1191794 | B.1.1     | Zimbabwe/ZW-16371/2020 | ZW |
| Zimbabwe/ZW-16384/2020 | Africa | Zimbabwe | EPI_ISL_1195298 | B.1.1     | Zimbabwe/ZW-16384/2020 | ZW |
| Zimbabwe/ZW-16394/2020 | Africa | Zimbabwe | EPI_ISL_1191795 | B.1.1.306 | Zimbabwe/ZW-16394/2020 | ZW |
| Zimbabwe/ZW-16396/2020 | Africa | Zimbabwe | EPI_ISL_1191796 | B.1       | Zimbabwe/ZW-16396/2020 | ZW |
| Zimbabwe/ZW-16428/2020 | Africa | Zimbabwe | EPI_ISL_1191797 | B.1.1     | Zimbabwe/ZW-16428/2020 | ZW |
| Zimbabwe/ZW-16429/2020 | Africa | Zimbabwe | EPI_ISL_1191798 | B.1.1     | Zimbabwe/ZW-16429/2020 | ZW |
| Zimbabwe/ZW-16433/2020 | Africa | Zimbabwe | EPI_ISL_1191799 | B.1.1     | Zimbabwe/ZW-16433/2020 | ZW |
| Zimbabwe/ZW-16442/2020 | Africa | Zimbabwe | EPI_ISL_1191800 | B.1.1     | Zimbabwe/ZW-16442/2020 | ZW |
| Zimbabwe/ZW-16449/2020 | Africa | Zimbabwe | EPI_ISL_1191801 | B.1       | Zimbabwe/ZW-16449/2020 | ZW |
| Zimbabwe/ZW-16452/2020 | Africa | Zimbabwe | EPI_ISL_1191802 | B.1.1     | Zimbabwe/ZW-16452/2020 | ZW |
| Zimbabwe/ZW-16502/2020 | Africa | Zimbabwe | EPI_ISL_1191803 | B.1.1     | Zimbabwe/ZW-16502/2020 | ZW |
| Zimbabwe/ZW-16535/2020 | Africa | Zimbabwe | EPI_ISL_1191804 | B.1.1     | Zimbabwe/ZW-16535/2020 | ZW |
| Zimbabwe/ZW-168/2020   | Africa | Zimbabwe | EPI_ISL_644743  | A         | Zimbabwe/ZW-168/2020   | ZW |
| Zimbabwe/ZW-169/2020   | Africa | Zimbabwe | EPI_ISL_647976  | A         | Zimbabwe/ZW-169/2020   | ZW |
| Zimbabwe/ZW-1714/2020  | Africa | Zimbabwe | EPI_ISL_644785  | B.1.446   | Zimbabwe/ZW-1714/2020  | ZW |
| Zimbabwe/ZW-214/2020   | Africa | Zimbabwe | EPI_ISL_644764  | A         | Zimbabwe/ZW-214/2020   | ZW |
| Zimbabwe/ZW-25/2020    | Africa | Zimbabwe | EPI_ISL_647977  | B.1.446   | Zimbabwe/ZW-25/2020    | ZW |
| Zimbabwe/ZW-25117/2020 | Africa | Zimbabwe | EPI_ISL_1191805 | B.1       | Zimbabwe/ZW-25117/2020 | ZW |
| Zimbabwe/ZW-25226/2020 | Africa | Zimbabwe | EPI_ISL_1191806 | B.1       | Zimbabwe/ZW-25226/2020 | ZW |
| Zimbabwe/ZW-25236/2020 | Africa | Zimbabwe | EPI_ISL_1191807 | B.1.1     | Zimbabwe/ZW-25236/2020 | ZW |
| Zimbabwe/ZW-25243/2020 | Africa | Zimbabwe | EPI_ISL_1191808 | B.1.1     | Zimbabwe/ZW-25243/2020 | ZW |
| Zimbabwe/ZW-25248/2020 | Africa | Zimbabwe | EPI_ISL_1191809 | B.1.1     | Zimbabwe/ZW-25248/2020 | ZW |
| Zimbabwe/ZW-25251/2020 | Africa | Zimbabwe |                 | B.1.1     | Zimbabwe/ZW-25251/2020 | ZW |
| Zimbabwe/ZW-25255/2020 | Africa | Zimbabwe | EPI_ISL_1191811 | B.1.1     | Zimbabwe/ZW-25255/2020 | ZW |
| Zimbabwe/ZW-25259/2020 | Africa | Zimbabwe | EPI_ISL_1191812 | B.1.1     | Zimbabwe/ZW-25259/2020 | ZW |
| Zimbabwe/ZW-25262/2020 | Africa | Zimbabwe | EPI_ISL_1191813 | B.1.1.111 | Zimbabwe/ZW-25262/2020 | ZW |

|                        |        |          |                 |           |                        |    |
|------------------------|--------|----------|-----------------|-----------|------------------------|----|
| Zimbabwe/ZW-25614/2020 | Africa | Zimbabwe | EPI_ISL_1191814 | B.1.1     | Zimbabwe/ZW-25614/2020 | ZW |
| Zimbabwe/ZW-25639/2020 | Africa | Zimbabwe | EPI_ISL_1191815 | B.1.381   | Zimbabwe/ZW-25639/2020 | ZW |
| Zimbabwe/ZW-25731/2020 | Africa | Zimbabwe | EPI_ISL_1191816 | B.1       | Zimbabwe/ZW-25731/2020 | ZW |
| Zimbabwe/ZW-25BY/2020  | Africa | Zimbabwe | EPI_ISL_644787  | B.1.446   | Zimbabwe/ZW-25BY/2020  | ZW |
| Zimbabwe/ZW-27BY/2020  | Africa | Zimbabwe | EPI_ISL_644753  | B.1.446   | Zimbabwe/ZW-27BY/2020  | ZW |
| Zimbabwe/ZW-28796/2020 | Africa | Zimbabwe | EPI_ISL_1191817 | B.1.1.111 | Zimbabwe/ZW-28796/2020 | ZW |
| Zimbabwe/ZW-28979/2020 | Africa | Zimbabwe | EPI_ISL_1191818 | B.1.1.111 | Zimbabwe/ZW-28979/2020 | ZW |
| Zimbabwe/ZW-28983/2020 | Africa | Zimbabwe | EPI_ISL_1191819 | B.1.1     | Zimbabwe/ZW-28983/2020 | ZW |
| Zimbabwe/ZW-28984/2020 | Africa | Zimbabwe | EPI_ISL_1191820 | B.1.1     | Zimbabwe/ZW-28984/2020 | ZW |
| Zimbabwe/ZW-28998/2020 | Africa | Zimbabwe |                 | B.1.1     | Zimbabwe/ZW-28998/2020 | ZW |
| Zimbabwe/ZW-28BY/2020  | Africa | Zimbabwe | EPI_ISL_644788  | B.1.446   | Zimbabwe/ZW-28BY/2020  | ZW |
| Zimbabwe/ZW-29/2020    | Africa | Zimbabwe | EPI_ISL_647978  | B.1.446   | Zimbabwe/ZW-29/2020    | ZW |
| Zimbabwe/ZW-29055/2020 | Africa | Zimbabwe | EPI_ISL_1191822 | B.1.1.111 | Zimbabwe/ZW-29055/2020 | ZW |
| Zimbabwe/ZW-307/2020   | Africa | Zimbabwe | EPI_ISL_644744  | B.1       | Zimbabwe/ZW-307/2020   | ZW |
| Zimbabwe/ZW-31066/2020 | Africa | Zimbabwe | EPI_ISL_1191823 | B.1.1     | Zimbabwe/ZW-31066/2020 | ZW |
| Zimbabwe/ZW-3182/2020  | Africa | Zimbabwe | EPI_ISL_647979  | B.1.446   | Zimbabwe/ZW-3182/2020  | ZW |
| Zimbabwe/ZW-32726/2020 | Africa | Zimbabwe | EPI_ISL_1191824 | B.1.1     | Zimbabwe/ZW-32726/2020 | ZW |
| Zimbabwe/ZW-33031/2020 | Africa | Zimbabwe | EPI_ISL_1191825 | B.1.1.200 | Zimbabwe/ZW-33031/2020 | ZW |
| Zimbabwe/ZW-33039/2020 | Africa | Zimbabwe | EPI_ISL_1191826 | B.1.1.200 | Zimbabwe/ZW-33039/2020 | ZW |
| Zimbabwe/ZW-33044/2020 | Africa | Zimbabwe | EPI_ISL_1191827 | B.1.1.200 | Zimbabwe/ZW-33044/2020 | ZW |
| Zimbabwe/ZW-33175/2020 | Africa | Zimbabwe | EPI_ISL_1191828 | B.1.1     | Zimbabwe/ZW-33175/2020 | ZW |
| Zimbabwe/ZW-333/2020   | Africa | Zimbabwe | EPI_ISL_644783  | B.1.446   | Zimbabwe/ZW-333/2020   | ZW |
| Zimbabwe/ZW-33572/2020 | Africa | Zimbabwe | EPI_ISL_1191829 | B.1.1     | Zimbabwe/ZW-33572/2020 | ZW |
| Zimbabwe/ZW-34091/2020 | Africa | Zimbabwe | EPI_ISL_1191830 | B.1       | Zimbabwe/ZW-34091/2020 | ZW |
| Zimbabwe/ZW-34139/2020 | Africa | Zimbabwe | EPI_ISL_1191831 | B.1.1     | Zimbabwe/ZW-34139/2020 | ZW |
| Zimbabwe/ZW-34550/2020 | Africa | Zimbabwe | EPI_ISL_1191832 | B.1.1     | Zimbabwe/ZW-34550/2020 | ZW |
| Zimbabwe/ZW-367/2020   | Africa | Zimbabwe | EPI_ISL_644781  | B.1.446   | Zimbabwe/ZW-367/2020   | ZW |
| Zimbabwe/ZW-391/2020   | Africa | Zimbabwe | EPI_ISL_644789  | B.1.446   | Zimbabwe/ZW-391/2020   | ZW |

|                       |        |          |                |           |                       |    |
|-----------------------|--------|----------|----------------|-----------|-----------------------|----|
| Zimbabwe/ZW-4305/2020 | Africa | Zimbabwe | EPI_ISL_644757 | B.1.1     | Zimbabwe/ZW-4305/2020 | ZW |
| Zimbabwe/ZW-480/2020  | Africa | Zimbabwe | EPI_ISL_644784 | B.1.446   | Zimbabwe/ZW-480/2020  | ZW |
| Zimbabwe/ZW-483/2020  | Africa | Zimbabwe | EPI_ISL_644773 | B.1.446   | Zimbabwe/ZW-483/2020  | ZW |
| Zimbabwe/ZW-532/2020  | Africa | Zimbabwe | EPI_ISL_644772 | B.1.446   | Zimbabwe/ZW-532/2020  | ZW |
| Zimbabwe/ZW-6903/2020 | Africa | Zimbabwe | EPI_ISL_644740 | B.1.1.57  | Zimbabwe/ZW-6903/2020 | ZW |
| Zimbabwe/ZW-6965/2020 | Africa | Zimbabwe | EPI_ISL_644790 | B.1.1.111 | Zimbabwe/ZW-6965/2020 | ZW |
| Zimbabwe/ZW-6969/2020 | Africa | Zimbabwe | EPI_ISL_644791 | B.1.1.111 | Zimbabwe/ZW-6969/2020 | ZW |
| Zimbabwe/ZW-6970/2020 | Africa | Zimbabwe | EPI_ISL_647980 | B.1.1.111 | Zimbabwe/ZW-6970/2020 | ZW |
| Zimbabwe/ZW-6971/2020 | Africa | Zimbabwe | EPI_ISL_644770 | B.1.1.111 | Zimbabwe/ZW-6971/2020 | ZW |
| Zimbabwe/ZW-6972/2020 | Africa | Zimbabwe | EPI_ISL_644758 | B.1.1.111 | Zimbabwe/ZW-6972/2020 | ZW |
| Zimbabwe/ZW-6973/2020 | Africa | Zimbabwe | EPI_ISL_644792 | B.1.1.111 | Zimbabwe/ZW-6973/2020 | ZW |
| Zimbabwe/ZW-6974/2020 | Africa | Zimbabwe | EPI_ISL_644793 | B.1.1.111 | Zimbabwe/ZW-6974/2020 | ZW |
| Zimbabwe/ZW-6976/2020 | Africa | Zimbabwe | EPI_ISL_644794 | B.1.1.111 | Zimbabwe/ZW-6976/2020 | ZW |
| Zimbabwe/ZW-6977/2020 | Africa | Zimbabwe | EPI_ISL_647981 | B.1.446   | Zimbabwe/ZW-6977/2020 | ZW |
| Zimbabwe/ZW-6978/2020 | Africa | Zimbabwe | EPI_ISL_644795 | B.1.1.111 | Zimbabwe/ZW-6978/2020 | ZW |
| Zimbabwe/ZW-6979/2020 | Africa | Zimbabwe | EPI_ISL_644796 | B.1.1.111 | Zimbabwe/ZW-6979/2020 | ZW |
| Zimbabwe/ZW-6980/2020 | Africa | Zimbabwe | EPI_ISL_644797 | B.1.1.111 | Zimbabwe/ZW-6980/2020 | ZW |
| Zimbabwe/ZW-6981/2020 | Africa | Zimbabwe | EPI_ISL_644798 | B.1.1.111 | Zimbabwe/ZW-6981/2020 | ZW |
| Zimbabwe/ZW-6982/2020 | Africa | Zimbabwe | EPI_ISL_644751 | B.1.1.111 | Zimbabwe/ZW-6982/2020 | ZW |
| Zimbabwe/ZW-6983/2020 | Africa | Zimbabwe | EPI_ISL_644763 | B.1.1.111 | Zimbabwe/ZW-6983/2020 | ZW |
| Zimbabwe/ZW-6984/2020 | Africa | Zimbabwe | EPI_ISL_644756 | B.1.1.111 | Zimbabwe/ZW-6984/2020 | ZW |
| Zimbabwe/ZW-6985/2020 | Africa | Zimbabwe | EPI_ISL_644752 | B.1.1.111 | Zimbabwe/ZW-6985/2020 | ZW |
| Zimbabwe/ZW-6987/2020 | Africa | Zimbabwe | EPI_ISL_644799 | B.1.1.111 | Zimbabwe/ZW-6987/2020 | ZW |
| Zimbabwe/ZW-6988/2020 | Africa | Zimbabwe | EPI_ISL_647982 | B.1.1.111 | Zimbabwe/ZW-6988/2020 | ZW |
| Zimbabwe/ZW-6989/2020 | Africa | Zimbabwe | EPI_ISL_644800 | B.1.1.111 | Zimbabwe/ZW-6989/2020 | ZW |
| Zimbabwe/ZW-6990/2020 | Africa | Zimbabwe | EPI_ISL_644801 | B.1.1.111 | Zimbabwe/ZW-6990/2020 | ZW |
| Zimbabwe/ZW-6991/2020 | Africa | Zimbabwe | EPI_ISL_644802 | B.1.1.111 | Zimbabwe/ZW-6991/2020 | ZW |
| Zimbabwe/ZW-6992/2020 | Africa | Zimbabwe | EPI_ISL_644803 | B.1.1.111 | Zimbabwe/ZW-6992/2020 | ZW |

|                       |        |          |                |           |                       |    |
|-----------------------|--------|----------|----------------|-----------|-----------------------|----|
| Zimbabwe/ZW-6993/2020 | Africa | Zimbabwe | EPI_ISL_644804 | B.1.1.111 | Zimbabwe/ZW-6993/2020 | ZW |
| Zimbabwe/ZW-6994/2020 | Africa | Zimbabwe | EPI_ISL_644780 | B.1.1.57  | Zimbabwe/ZW-6994/2020 | ZW |
| Zimbabwe/ZW-6996/2020 | Africa | Zimbabwe | EPI_ISL_644805 | B.1.1.111 | Zimbabwe/ZW-6996/2020 | ZW |
| Zimbabwe/ZW-6997/2020 | Africa | Zimbabwe | EPI_ISL_644806 | B.1.1.111 | Zimbabwe/ZW-6997/2020 | ZW |
| Zimbabwe/ZW-6998/2020 | Africa | Zimbabwe | EPI_ISL_644807 | B.1.1.111 | Zimbabwe/ZW-6998/2020 | ZW |
| Zimbabwe/ZW-6999/2020 | Africa | Zimbabwe | EPI_ISL_644808 | B.1.1.111 | Zimbabwe/ZW-6999/2020 | ZW |
| Zimbabwe/ZW-70/2020   | Africa | Zimbabwe | EPI_ISL_644766 | A         | Zimbabwe/ZW-70/2020   | ZW |
| Zimbabwe/ZW-7000/2020 | Africa | Zimbabwe | EPI_ISL_644762 | B.1.1.111 | Zimbabwe/ZW-7000/2020 | ZW |
| Zimbabwe/ZW-7001/2020 | Africa | Zimbabwe | EPI_ISL_644809 | B.1.1.111 | Zimbabwe/ZW-7001/2020 | ZW |
| Zimbabwe/ZW-7002/2020 | Africa | Zimbabwe | EPI_ISL_644810 | B.1.1.111 | Zimbabwe/ZW-7002/2020 | ZW |
| Zimbabwe/ZW-7003/2020 | Africa | Zimbabwe | EPI_ISL_644811 | B.1.1.111 | Zimbabwe/ZW-7003/2020 | ZW |
| Zimbabwe/ZW-7113/2020 | Africa | Zimbabwe | EPI_ISL_644738 | B.1.1.57  | Zimbabwe/ZW-7113/2020 | ZW |
| Zimbabwe/ZW-7178/2020 | Africa | Zimbabwe | EPI_ISL_644765 | B.1.1.57  | Zimbabwe/ZW-7178/2020 | ZW |
| Zimbabwe/ZW-8694/2020 | Africa | Zimbabwe | EPI_ISL_647983 | B.1.1     | Zimbabwe/ZW-8694/2020 | ZW |
| Zimbabwe/ZW-8894/2020 | Africa | Zimbabwe | EPI_ISL_644749 | B.1.1     | Zimbabwe/ZW-8894/2020 | ZW |
| Zimbabwe/ZW-8898/2020 | Africa | Zimbabwe |                | B.1       | Zimbabwe/ZW-8898/2020 | ZW |
| Zimbabwe/ZW-8911/2020 | Africa | Zimbabwe | EPI_ISL_644747 | B.1       | Zimbabwe/ZW-8911/2020 | ZW |
| Zimbabwe/ZW-8929/2020 | Africa | Zimbabwe | EPI_ISL_644739 | B.1.1     | Zimbabwe/ZW-8929/2020 | ZW |
| Zimbabwe/ZW-9090/2020 | Africa | Zimbabwe | EPI_ISL_647984 | B.1.1.459 | Zimbabwe/ZW-9090/2020 | ZW |
| Zimbabwe/ZW-9095/2020 | Africa | Zimbabwe | EPI_ISL_644748 | B.1.1.459 | Zimbabwe/ZW-9095/2020 | ZW |
| Zimbabwe/ZW-9096/2020 | Africa | Zimbabwe | EPI_ISL_644759 | B.1.1.459 | Zimbabwe/ZW-9096/2020 | ZW |
| Zimbabwe/ZW-9100/2020 | Africa | Zimbabwe | EPI_ISL_644754 | B.1.1.459 | Zimbabwe/ZW-9100/2020 | ZW |
| Zimbabwe/ZW-9102/2020 | Africa | Zimbabwe | EPI_ISL_644760 | B.1.1.459 | Zimbabwe/ZW-9102/2020 | ZW |
| Zimbabwe/ZW-9112/2020 | Africa | Zimbabwe | EPI_ISL_644777 | B.1       | Zimbabwe/ZW-9112/2020 | ZW |
| Zimbabwe/ZW-9115/2020 | Africa | Zimbabwe | EPI_ISL_644769 | B.1       | Zimbabwe/ZW-9115/2020 | ZW |
| Zimbabwe/ZW-9116/2020 | Africa | Zimbabwe | EPI_ISL_644778 | B.1       | Zimbabwe/ZW-9116/2020 | ZW |
| Zimbabwe/ZW-9129/2020 | Africa | Zimbabwe | EPI_ISL_644746 | B.1       | Zimbabwe/ZW-9129/2020 | ZW |
| Zimbabwe/ZW-9465/2020 | Africa | Zimbabwe | EPI_ISL_644741 | B.1       | Zimbabwe/ZW-9465/2020 | ZW |

|                       |        |          |                |           |                       |    |
|-----------------------|--------|----------|----------------|-----------|-----------------------|----|
| Zimbabwe/ZW-9469/2020 | Africa | Zimbabwe | EPI_ISL_644745 | B.1       | Zimbabwe/ZW-9469/2020 | ZW |
| Zimbabwe/ZW-9494/2020 | Africa | Zimbabwe | EPI_ISL_644812 | B.1       | Zimbabwe/ZW-9494/2020 | ZW |
| Zimbabwe/ZW-9506/2020 | Africa | Zimbabwe | EPI_ISL_644813 | B.1       | Zimbabwe/ZW-9506/2020 | ZW |
| Zimbabwe/ZW-9513/2020 | Africa | Zimbabwe | EPI_ISL_644814 | B.1       | Zimbabwe/ZW-9513/2020 | ZW |
| Zimbabwe/ZW-9515/2020 | Africa | Zimbabwe | EPI_ISL_644761 | B.1       | Zimbabwe/ZW-9515/2020 | ZW |
| Zimbabwe/ZW-9521/2020 | Africa | Zimbabwe | EPI_ISL_644815 | B.1       | Zimbabwe/ZW-9521/2020 | ZW |
| Zimbabwe/ZW-9527/2020 | Africa | Zimbabwe | EPI_ISL_644816 | B.1       | Zimbabwe/ZW-9527/2020 | ZW |
| Zimbabwe/ZW-9536/2020 | Africa | Zimbabwe | EPI_ISL_644742 | B.1       | Zimbabwe/ZW-9536/2020 | ZW |
| Zimbabwe/ZW-9537/2020 | Africa | Zimbabwe | EPI_ISL_644771 | B.1       | Zimbabwe/ZW-9537/2020 | ZW |
| Zimbabwe/ZW-9538/2020 | Africa | Zimbabwe | EPI_ISL_644817 | B.1       | Zimbabwe/ZW-9538/2020 | ZW |
| Zimbabwe/ZW-9811/2020 | Africa | Zimbabwe | EPI_ISL_644768 | B.1       | Zimbabwe/ZW-9811/2020 | ZW |
| Zimbabwe/ZW-9912/2020 | Africa | Zimbabwe | EPI_ISL_644779 | B.1.1.459 | Zimbabwe/ZW-9912/2020 | ZW |
| Zimbabwe/ZW-9947/2020 | Africa | Zimbabwe | EPI_ISL_644818 | B.1.1     | Zimbabwe/ZW-9947/2020 | ZW |
| Zimbabwe/ZW-9949/2020 | Africa | Zimbabwe | EPI_ISL_644819 | B.1.1     | Zimbabwe/ZW-9949/2020 | ZW |
| Zimbabwe/ZW-9951/2020 | Africa | Zimbabwe | EPI_ISL_644767 | B.1.1     | Zimbabwe/ZW-9951/2020 | ZW |
| Zimbabwe/ZW-9953/2020 | Africa | Zimbabwe | EPI_ISL_644820 | B.1.1     | Zimbabwe/ZW-9953/2020 | ZW |
| Zimbabwe/ZW-9955/2020 | Africa | Zimbabwe | EPI_ISL_644821 | B.1.1     | Zimbabwe/ZW-9955/2020 | ZW |
| Zimbabwe/ZW-9957/2020 | Africa | Zimbabwe | EPI_ISL_644755 | B.1.1     | Zimbabwe/ZW-9957/2020 | ZW |
| Zimbabwe/ZW-EC/2020   | Africa | Zimbabwe |                | B.1.446   | Zimbabwe/ZW-EC/2020   | ZW |



## **Appendix 1 (The COVID-19 Genomics UK (COG-UK) Consortium)**

**Funding acquisition, leadership, supervision, metadata curation, project administration, samples, logistics, Sequencing, analysis, and Software and analysis tools:**

Thomas R Connor<sup>33, 34</sup>, and Nicholas J Loman<sup>15</sup>.

**Leadership, supervision, sequencing, analysis, funding acquisition, metadata curation, project administration, samples, logistics, and visualisation:**

Samuel C Robson<sup>68</sup>.

**Leadership, supervision, project administration, visualisation, samples, logistics, metadata curation and software and analysis tools:**

Tanya Golubchik<sup>27</sup>.

**Leadership, supervision, metadata curation, project administration, samples, logistics sequencing and analysis:**

M. Estee Torok<sup>8, 10</sup>.

**Project administration, metadata curation, samples, logistics, sequencing, analysis, and software and analysis tools:**

William L Hamilton<sup>8, 10</sup>.

**Leadership, supervision, samples logistics, project administration, funding acquisition sequencing and analysis:**

David Bonsall<sup>27</sup>.

**Leadership and supervision, sequencing, analysis, funding acquisition, visualisation and software and analysis tools:**

Ali R Awan<sup>74</sup>.

**Leadership and supervision, funding acquisition, sequencing, analysis, metadata curation, samples and logistics:**

Sally Corden<sup>33</sup>.

**Leadership supervision, sequencing analysis, samples, logistics, and metadata curation:** Ian Goodfellow<sup>11</sup>.

**Leadership, supervision, sequencing, analysis, samples, logistics, and Project administration:**

Darren L Smith<sup>60, 61</sup>.

**Project administration, metadata curation, samples, logistics, sequencing and analysis:**

Martin D Curran<sup>14</sup>, and Surendra Parmar<sup>14</sup>.

**Samples, logistics, metadata curation, project administration sequencing and analysis:**

James G Shepherd<sup>21</sup>.

**Sequencing, analysis, project administration, metadata curation and software and analysis tools:**

Matthew D Parker<sup>38</sup> and Dinesh Aggarwal<sup>1, 2, 3</sup>.

**Leadership, supervision, funding acquisition, samples, logistics, and metadata curation:**

Catherine Moore<sup>33</sup> .

**Leadership, supervision, metadata curation, samples, logistics, sequencing and analysis:**

Derek J Fairley<sup>6, 88</sup>, Matthew W Loose<sup>54</sup>, and Joanne Watkins<sup>33</sup>.

**Metadata curation, sequencing, analysis, leadership, supervision and software and analysis tools:**

Matthew Bull<sup>33</sup> , and Sam Nicholls<sup>15</sup> .

**Leadership, supervision, visualisation, sequencing, analysis and software and analysis tools:**David M Aanensen<sup>1, 30</sup>.

**Sequencing, analysis, samples, logistics, metadata curation, and visualisation:**

Sharon Glaysher<sup>70</sup> .

**Metadata curation, sequencing, analysis, visualisation, software and analysis tools:**

Matthew Bashton<sup>60</sup>, and Nicole Pacchiarini<sup>33</sup>.

**Sequencing, analysis, visualisation, metadata curation, and software and analysis tools:**

Anthony P Underwood<sup>1, 30</sup>.

**Funding acquisition, leadership, supervision and project administration:**

Thushan I de Silva<sup>38</sup>, and Dennis Wang<sup>38</sup>.

**Project administration, samples, logistics, leadership and supervision:**

Monique Andersson<sup>28</sup> , Anoop J Chauhan<sup>70</sup>, Mariateresa de Cesare<sup>26</sup>, Catherine Ludden<sup>1,3</sup> , and Tabitha W Mahungu<sup>91</sup>.

**Sequencing, analysis, project administration and metadata curation:**

Rebecca Dewar<sup>20</sup>, and Martin P McHugh<sup>20</sup>.

**Samples, logistics, metadata curation and project administration:**

Natasha G Jesudason<sup>21</sup>, Kathy K Li MBBCh<sup>21</sup>, Rajiv N Shah<sup>21</sup>, and Yusri Taha<sup>66</sup>.

**Leadership, supervision, funding acquisition and metadata curation:**

Kate E Templeton<sup>20</sup>.

**Leadership, supervision, funding acquisition, sequencing and analysis:**  
Simon Cottrell <sup>33</sup>, Justin O'Grady <sup>51</sup>, Andrew Rambaut <sup>19</sup>, and Colin P Smith<sup>93</sup>.

**Leadership, supervision, metadata curation , sequencing and analysis:**  
Matthew T.G. Holden <sup>87</sup>, and Emma C Thomson <sup>21</sup>.

**Leadership, supervision, samples, logistics and metadata curation:**

Samuel Moses <sup>81, 82</sup>.

**Sequencing, analysis, leadership, supervision, samples and logistics:**  
Meera Chand <sup>7</sup>, Chrystala Constantinidou <sup>71</sup>, Alistair C Darby <sup>46</sup>, Julian A Hiscox <sup>46</sup>, Steve Paterson <sup>46</sup>, and Meera Unnikrishnan <sup>71</sup>.

**Sequencing, analysis, leadership and supervision and software and analysis tools:**

Andrew J Page <sup>51</sup>, and Erik M Volz <sup>96</sup>.

**Samples, logistics, sequencing, analysis and metadata curation:**

Charlotte J Houldcroft <sup>8</sup>, Aminu S Jahun <sup>11</sup>, James P McKenna <sup>88</sup>, Luke W Meredith <sup>11</sup>, Andrew Nelson <sup>61</sup>, Sarojini Pandey <sup>72</sup>, and Gregory R Young <sup>60</sup>.

**Sequencing, analysis, metadata curation, and software and analysis tools:**

Anna Price <sup>34</sup>, Sara Rey <sup>33</sup>, Sunando Roy <sup>41</sup>, Ben Temperton<sup>49</sup>, and Matthew Wyles <sup>38</sup>.

**Sequencing, analysis, metadata curation and visualisation:**

StefanRooke<sup>19</sup>, and Sharif Shaaban <sup>87</sup>.

**Visualisation, sequencing, analysis and software and analysis tools:**

Helen Adams <sup>35</sup>, Yann Bourgeois <sup>69</sup>, Katie F Loveson <sup>68</sup>, Áine O'Toole <sup>19</sup>, and Richard Stark <sup>71</sup>.

**Project administration, leadership and supervision:**

Ewan M Harrison <sup>1, 3</sup>, David Heyburn <sup>33</sup>, and Sharon J Peacock <sup>2, 3</sup>

**Project administration and funding acquisition:**

David Buck <sup>26</sup>, and Michaela John<sup>36</sup>

**Sequencing, analysis and project administration:**

Dorota Jamrozy <sup>1</sup>, and Joshua Quick <sup>15</sup>

**Samples, logistics, and project administration:**

Rahul Batra <sup>78</sup>, Katherine L Bellis <sup>1, 3</sup>, Beth Blane <sup>3</sup>, Sophia T Girgis <sup>3</sup>, Angie Green <sup>26</sup>, Anita Justice <sup>28</sup>, Mark Kristiansen <sup>41</sup>, and Rachel J Williams <sup>41</sup>.

**Project administration, software and analysis tools:**

Radoslaw Poplawski<sup>15</sup>.

#### **Project administration and visualisation:**

Garry P Scarlett<sup>69</sup>.

#### **Leadership, supervision, and funding acquisition:**

John A Todd<sup>26</sup>, Christophe Fraser<sup>27</sup>, Judith Breuer<sup>40,41</sup>, Sergi Castellano<sup>41</sup>, Stephen L Michell<sup>49</sup>, Dimitris Gramatopoulos<sup>73</sup>, and Jonathan Edgeworth<sup>78</sup>.

#### **Leadership, supervision and metadata curation:**

Gemma L Kay<sup>51</sup>.

#### **Leadership, supervision, sequencing and analysis:**

Ana da Silva Filipe<sup>21</sup>, Aaron R Jeffries<sup>49</sup>, Sascha Ott<sup>71</sup>, Oliver Pybus<sup>24</sup>, David L Robertson<sup>21</sup>, David A Simpson<sup>6</sup>, and Chris Williams<sup>33</sup>.

#### **Samples, logistics, leadership and supervision:**

Cressida Auckland<sup>50</sup>, John Boyes<sup>83</sup>, Samir Dervisevic<sup>52</sup>, Sian Ellard<sup>49, 50</sup>, Sonia Goncalves<sup>1</sup>, Emma J Meader<sup>51</sup>, Peter Muir<sup>2</sup>, Husam Osman<sup>95</sup>, Reenesh Prakash<sup>52</sup>, Venkat Sivaprakasam<sup>18</sup>, and Ian B Vipond<sup>2</sup>.

#### **Leadership, supervision and visualisation**

Jane AH Masoli<sup>49, 50</sup>.

#### **Sequencing, analysis and metadata curation**

Nabil-Fareed Alikhan<sup>51</sup>, Matthew Carlile<sup>54</sup>, Noel Craine<sup>33</sup>, Sam T Haldenby<sup>46</sup>, Nadine Holmes<sup>54</sup>, Ronan A Lyons<sup>37</sup>, Christopher Moore<sup>54</sup>, Malorie Perry<sup>33</sup>, Ben Warne<sup>80</sup>, and Thomas Williams<sup>19</sup>.

#### **Samples, logistics and metadata curation:**

Lisa Berry<sup>72</sup>, Andrew Bosworth<sup>95</sup>, Julianne Rose Brown<sup>40</sup>, Sharon Campbell<sup>67</sup>, Anna Casey<sup>17</sup>, Gemma Clark<sup>56</sup>, Jennifer Collins<sup>66</sup>, Alison Cox<sup>43, 44</sup>, Thomas Davis<sup>84</sup>, Gary Eltringham<sup>66</sup>, Cariad Evans<sup>38, 39</sup>, Clive Graham<sup>64</sup>, Fenella Halstead<sup>18</sup>, Kathryn Ann Harris<sup>40</sup>, Christopher Holmes<sup>58</sup>, Stephanie Hutchings<sup>2</sup>, Miren Iturriza-Gomara<sup>46</sup>, Kate Johnson<sup>38, 39</sup>, Katie Jones<sup>72</sup>, Alexander J Keeley<sup>38</sup>, Bridget A Knight<sup>49, 50</sup>, Cherian Koshy<sup>90</sup>, Steven Liggett<sup>63</sup>, Hannah Lowe<sup>81</sup>, Anita O Lucaci<sup>46</sup>, Jessica Lynch<sup>25, 29</sup>, Patrick C McClure<sup>55</sup>, Nathan Moore<sup>31</sup>, Matilde Mori<sup>25, 29, 32</sup>, David G Partridge<sup>38, 39</sup>, Pinglawathee Madona<sup>43, 44</sup>, Hannah M Pymont<sup>2</sup>, Paul Anthony Randell<sup>43, 44</sup>, Mohammad Raza<sup>38, 39</sup>, Felicity Ryan<sup>81</sup>, Robert Shaw<sup>28</sup>, Tim J Sloan<sup>57</sup>, and Emma Swindells<sup>65</sup>.

#### **Sequencing, analysis, Samples and logistics:**

Alexander Adams<sup>33</sup>, Hibo Asad<sup>33</sup>, Alec Birchley<sup>33</sup>, Tony Thomas Brooks<sup>41</sup>, Giselda Bucca<sup>93</sup>, Ethan Butcher<sup>70</sup>, Sarah L Caddy<sup>13</sup>, Laura G Caller<sup>2, 3, 12</sup>, Yasmin Chaudhry<sup>11</sup>, Jason Coombes<sup>33</sup>, Michelle Cronin<sup>33</sup>, Patricia L Dyal<sup>41</sup>, Johnathan M Evans<sup>33</sup>, Laia Fina<sup>33</sup>, Bree Gatica-Wilcox<sup>33</sup>, Iliana Georgana<sup>11</sup>, Lauren Gilbert<sup>33</sup>, Lee Graham<sup>33</sup>, Danielle C Groves<sup>38</sup>, Grant Hall<sup>11</sup>, Ember Hilvers<sup>33</sup>, Myra Hosmillo<sup>11</sup>, Hannah Jones<sup>33</sup>, Sophie Jones<sup>33</sup>, Fahad A Khokhar<sup>13</sup>, Sara Kumziene-Summerhayes<sup>33</sup>,

George MacIntyre-Cockett <sup>26</sup>, Rocio T Martinez Nunez <sup>94</sup>, Caoimhe McKerr <sup>33</sup>, Claire McMurray <sup>15</sup>, Richard Myers <sup>7</sup>, Yasmin Nicole Panchbhaya <sup>41</sup>, Malte L Pinckert <sup>11</sup>, Amy Plimmer <sup>33</sup>, Joanne Stockton <sup>15</sup>, Sarah Taylor <sup>33</sup>, Alicia Thornton <sup>7</sup>, Amy Trebes <sup>26</sup>, Alexander J Trotter <sup>51</sup>, Helena Jane Tutill <sup>41</sup>, Charlotte A Williams <sup>41</sup>, Anna Yakovleva <sup>11</sup> and Wen C Yew <sup>62</sup>.

### **Sequencing, analysis and software and analysis tools:**

Mohammad T Alam <sup>71</sup>, Laura Baxter <sup>71</sup>, Olivia Boyd <sup>96</sup>, Fabricia F. Nascimento <sup>96</sup>, Timothy M Freeman <sup>38</sup>, Lily Geidelberg <sup>96</sup>, Joseph Hughes <sup>21</sup>, David Jorgensen <sup>96</sup>, Benjamin B Lindsey <sup>38</sup>, Richard J Orton <sup>21</sup>, Manon Ragonnet-Cronin <sup>96</sup> Joel Southgate <sup>33, 34</sup>, and Sreenu Vattipally <sup>21</sup>.

### **Samples, logistics and software and analysis tools:**

Igor Starinskij <sup>23</sup>.

### **Visualisation and software and analysis tools:**

Joshua B Singer <sup>21</sup>, Khalil Abudahab <sup>1, 30</sup>, Leonardo de Oliveira Martins <sup>51</sup>, Thanh Le-Viet <sup>51</sup>, Mirko Menegazzo <sup>30</sup>, Ben EW Taylor <sup>1, 30</sup>, and Corin A Yeats <sup>30</sup>.

### **Project Administration:**

Sophie Palmer <sup>3</sup>, Carol M Churcher <sup>3</sup>, Alisha Davies <sup>33</sup>, Elen De Lacy <sup>33</sup>, Fatima Downing <sup>33</sup>, Sue Edwards <sup>33</sup>, Nikki Smith <sup>38</sup>, Francesc Coll <sup>97</sup>, Nazreen F Hadjirin <sup>3</sup> and Frances Bolt <sup>44, 45</sup>.

### **Leadership and supervision:**

Alex Alderton<sup>1</sup>, Matt Berriman<sup>1</sup>, Ian G Charles <sup>51</sup>, Nicholas Cortes <sup>31</sup>, Tanya Curran <sup>88</sup>, John Danesh<sup>1</sup>, Sahar Eldirdiri <sup>84</sup>, Ngozi Elumogo <sup>52</sup>, Andrew Hattersley <sup>49, 50</sup>, Alison Holmes <sup>44, 45</sup>, Robin Howe <sup>33</sup>, Rachel Jones <sup>33</sup>, Anita Kenyon <sup>84</sup>, Robert A Kingsley <sup>51</sup>, Dominic Kwiatkowski <sup>1, 9</sup>, Cordelia Langford<sup>1</sup>, Jenifer Mason<sup>48</sup>, Alison E Mather <sup>51</sup>, Lizzie Meadows <sup>51</sup>, Sian Morgan <sup>36</sup>, James Price <sup>44, 45</sup>, Trevor I Robinson <sup>48</sup>, Giri Shankar <sup>33</sup>, John Wain <sup>51</sup>, and Mark A Webber <sup>51</sup>.

### **Metadata curation:**

Declan T Bradley <sup>5, 6</sup>, Michael R Chapman <sup>1, 3, 4</sup>, Derrick Croke <sup>28</sup>, David Eyre <sup>28</sup>, Martyn Guest <sup>34</sup>, Huw Gulliver <sup>34</sup>, Sarah Hoosdally <sup>28</sup>, Christine Kitchen <sup>34</sup>, Ian Merrick <sup>34</sup>, Siddharth Mookerjee <sup>44, 45</sup>, Robert Munn <sup>34</sup>, Timothy Peto <sup>28</sup>, Will Potter <sup>52</sup>, Dheeraj K Sethi <sup>52</sup>, Wendy Smith <sup>56</sup>, Luke B Snell <sup>75, 94</sup>, Rachael Stanley <sup>52</sup>, Claire Stuart <sup>52</sup> and Elizabeth Wastenge<sup>20</sup>.

### **Sequencing and analysis:**

Erwan Acheson <sup>6</sup>, Safiah Afifi <sup>36</sup>, Elias Allara <sup>2, 3</sup>, Roberto Amato <sup>1</sup>, Adrienn Angyal <sup>38</sup>, Elihu Aranday-Cortes <sup>21</sup>, Cristina Ariani <sup>1</sup>, Jordan Ashworth <sup>19</sup>, Stephen Attwood <sup>24</sup>, Alp Aydin <sup>51</sup>, David J Baker <sup>51</sup>, Carlos E Balcazar <sup>19</sup>, Angela Beckett <sup>68</sup> Robert Beer <sup>36</sup>, Gilberto Betancor <sup>76</sup>, Emma Betteridge <sup>1</sup>, David Bibby <sup>7</sup>, Daniel Bradshaw<sup>7</sup>, Catherine Bresner <sup>34</sup>, Hannah E Bridgewater <sup>71</sup>, Alice Broos <sup>21</sup>, Rebecca Brown <sup>38</sup>, Paul E Brown <sup>71</sup>, Kirstyn Bruncker <sup>22</sup>, Stephen N Carmichael <sup>21</sup>, Jeffrey K. J. Cheng <sup>71</sup>, Dr Rachel Colquhoun <sup>19</sup>, Gavin Dabrera <sup>7</sup>, Johnny Debebe <sup>54</sup>, Eleanor Drury <sup>1</sup>, Louis du Plessis <sup>24</sup>, Richard Eccles <sup>46</sup>, Nicholas Ellaby <sup>7</sup>, Audrey Farbos <sup>49</sup>, Ben Farr <sup>1</sup>, Jacqueline Findlay <sup>41</sup>, Chloe L Fisher <sup>74</sup>, Leysa Marie Forrest <sup>41</sup>, Sarah Francois <sup>24</sup>, Lucy R. Frost <sup>71</sup>, William Fuller<sup>34</sup>, Eileen Gallagher <sup>7</sup>, Michael D Gallagher <sup>19</sup>, Matthew

Gemmell <sup>46</sup>, Rachel AJ Gilroy <sup>51</sup>, Scott Goodwin <sup>1</sup>, Luke R Green <sup>38</sup>, Richard Gregory <sup>46</sup>, Natalie Groves <sup>7</sup>, James W Harrison <sup>49</sup>, Hassan Hartman <sup>7</sup>, Andrew R Hesketh <sup>93</sup>, Verity Hill <sup>19</sup>, Jonathan Hubb <sup>7</sup>, Margaret Hughes <sup>46</sup>, David K Jackson <sup>1</sup>, Ben Jackson <sup>19</sup>, Keith James <sup>1</sup>, Natasha Johnson <sup>21</sup>, Ian Johnston <sup>1</sup>, Jon-Paul Keatley <sup>1</sup>, Moritz Kraemer <sup>24</sup>, Angie Lackenby <sup>7</sup>, Mara Lawniczak <sup>1</sup>, David Lee <sup>7</sup>, Rich Livett <sup>1</sup>, Stephanie Lo <sup>1</sup>, Daniel Mair <sup>21</sup>, Joshua Maksimovic <sup>36</sup>, Nikos Manesis <sup>7</sup>, Robin Manley <sup>49</sup>, Carmen Manso <sup>7</sup>, Angela Marchbank <sup>34</sup>, Inigo Martincorena <sup>1</sup>, Tamyo Mbisa <sup>7</sup>, Kathryn McCluggage <sup>36</sup>, JT McCrone <sup>19</sup>, Shahjahan Miah <sup>7</sup>, Michelle L Michelsen <sup>49</sup>, Mari Morgan <sup>33</sup>, Gaia Nebbia <sup>78</sup>, Charlotte Nelson <sup>46</sup>, Jenna Nichols <sup>21</sup>, Paola Niola <sup>41</sup>, Kyriaki Nomikou <sup>21</sup>, Steve Palmer <sup>1</sup>, Naomi Park <sup>1</sup>, Yasmin A Parr <sup>1</sup>, Paul J Parsons <sup>38</sup>, Vineet Patel <sup>7</sup>, Minal Patel <sup>1</sup>, Clare Pearson <sup>2,1</sup>, Steven Platt <sup>7</sup>, Christoph Puethe <sup>1</sup>, Mike Quail <sup>1</sup>, Jayna Raghwan <sup>24</sup>, Lucille Rainbow <sup>46</sup>, Shavanthi Rajatileka <sup>1</sup>, Mary Ramsay <sup>7</sup>, Paola C Resende Silva <sup>41,42</sup>, Steven Rudder <sup>51</sup>, Chris Ruis <sup>3</sup>, Christine M Sambles <sup>49</sup>, Fei Sang <sup>54</sup>, Ulf Schaefer <sup>7</sup>, Emily Scher <sup>19</sup>, Carol Scott <sup>1</sup>, Lesley Shirley <sup>1</sup>, Adrian W Signell <sup>76</sup>, John Sillitoe <sup>1</sup>, Christen Smith <sup>1</sup>, Dr Katherine L Smollett <sup>21</sup>, Karla Spellman <sup>36</sup>, Thomas D Stanton <sup>19</sup>, David J Studholme <sup>49</sup>, Grace Taylor-Joyce <sup>71</sup>, Ana P Tedim <sup>51</sup>, Thomas Thompson <sup>6</sup>, Nicholas M Thomson <sup>51</sup>, Scott Thurston <sup>1</sup>, Lily Tong <sup>21</sup>, Gerry Tonkin-Hill <sup>1</sup>, Rachel M Tucker <sup>38</sup>, Edith E Vamos <sup>4</sup>, Tetyana Vasylyeva <sup>24</sup>, Joanna Warwick-Dugdale <sup>49</sup>, Danni Weldon <sup>1</sup>, Mark Whitehead <sup>46</sup>, David Williams <sup>7</sup>, Kathleen A Williamson <sup>19</sup>, Harry D Wilson <sup>76</sup>, Trudy Workman <sup>34</sup>, Muhammad Yasir <sup>51</sup>, Xiaoyu Yu <sup>19</sup>, and Alex Zarebski <sup>24</sup>.

### **Samples and logistics:**

Evelien M Adriaenssens <sup>51</sup>, Shazaad S Y Ahmad <sup>2, 47</sup>, Adela Alcolea-Medina <sup>59, 77</sup>, John Allan <sup>60</sup>, Patawee Asamaphan <sup>21</sup>, Laura Atkinson <sup>40</sup>, Paul Baker <sup>63</sup>, Jonathan Ball <sup>55</sup>, Edward Barton <sup>64</sup>, Mathew A Beale <sup>1</sup>, Charlotte Beaver <sup>1</sup>, Andrew Beggs <sup>16</sup>, Andrew Bell <sup>51</sup>, Duncan J Berger <sup>1</sup>, Louise Berry <sup>56</sup>, Claire M Bewshea <sup>49</sup>, Kelly Bicknell <sup>70</sup>, Paul Bird <sup>58</sup>, Chloe Bishop <sup>7</sup>, Tim Boswell <sup>56</sup>, Cassie Breen <sup>48</sup>, Sarah K Buddenborg <sup>1</sup>, Shirelle Burton-Fanning <sup>66</sup>, Vicki Chalker <sup>7</sup>, Joseph G Chappell <sup>55</sup>, Themoula Charalampous <sup>78, 94</sup>, Claire Cormie <sup>3</sup>, Nick Cortes <sup>29, 25</sup>, Lindsay J Coupland <sup>52</sup>, Angela Cowell <sup>48</sup>, Rose K Davidson <sup>53</sup>, Joana Dias <sup>3</sup>, Maria Diaz <sup>51</sup>, Thomas Dibling <sup>1</sup>, Matthew J Dorman <sup>1</sup>, Nichola Duckworth <sup>57</sup>, Scott Elliott <sup>70</sup>, Sarah Essex <sup>63</sup>, Karlie Fallon <sup>58</sup>, Theresa Feltwell <sup>8</sup>, Vicki M Fleming <sup>56</sup>, Sally Forrest <sup>3</sup>, Luke Foulser <sup>1</sup>, Maria V Garcia-Casado <sup>1</sup>, Artemis Gavriil <sup>41</sup>, Ryan P George <sup>47</sup>, Laura Gifford <sup>33</sup>, Harmeet K Gill <sup>3</sup>, Jane Greenaway <sup>65</sup>, Luke Griffith <sup>53</sup>, Ana Victoria Gutierrez <sup>51</sup>, Antony D Hale <sup>85</sup>, Tanzina Haque <sup>91</sup>, Katherine L Harper <sup>85</sup>, Ian Harrison <sup>7</sup>, Judith Heaney <sup>89</sup>, Thomas Helmer <sup>58</sup>, Ellen E Higginson <sup>3</sup>, Richard Hopes <sup>2</sup>, Hannah C Howson-Wells <sup>56</sup>, Adam D Hunter <sup>1</sup>, Robert Impey <sup>70</sup>, Dianne Irish-Tavares <sup>91</sup>, David A Jackson <sup>1</sup>, Kathryn A Jackson <sup>46</sup>, Amelia Joseph <sup>56</sup>, Leanne Kane <sup>1</sup>, Sally Kay <sup>1</sup>, Leanne M Kermack <sup>3</sup>, Manjinder Khakh <sup>56</sup>, Stephen P Kidd <sup>29, 25, 31</sup>, Anastasia Kolyva <sup>51</sup>, Jack CD Lee <sup>40</sup>, Laura Letchford <sup>1</sup>, Nick Levene <sup>79</sup>, Lisa J Levett <sup>89</sup>, Michelle M Lister <sup>56</sup>, Allyson Lloyd <sup>70</sup>, Joshua Loh <sup>60</sup>, Louissa R Macfarlane-Smith <sup>85</sup>, Nicholas W Machin <sup>2, 47</sup>, Mailis Maes <sup>3</sup>, Samantha McGuigan <sup>1</sup>, Liz McMinn <sup>1</sup>, Lamia Mestek-Boukhibar <sup>41</sup>, Zoltan Molnar <sup>6</sup>, Lynn Monaghan <sup>79</sup>, Catrin Moore <sup>27</sup>, Plamena Naydenova <sup>3</sup>, Alexandra S Neaverson <sup>1</sup>, Rachel Nelson <sup>1</sup>, Marc O Niebel <sup>21</sup>, Elaine O'Toole <sup>48</sup>, Debra Padgett <sup>64</sup>, Gaurang Patel <sup>1</sup>, Brendan Al Payne <sup>66</sup>, Liam Prestwood <sup>1</sup>, Veena Raviprakash <sup>67</sup>, Nicola Reynolds <sup>86</sup>, Alex Richter <sup>16</sup>, Esther Robinson <sup>95</sup>, Hazel A Rogers <sup>1</sup>, Aileen Rowan <sup>96</sup>, Garren Scott <sup>64</sup>, Divya Shah <sup>40</sup>, Nicola Sheriff <sup>67</sup>, Graciela Sluga, Emily Souster <sup>1</sup>, Michael Spencer-Chapman <sup>1</sup>, Sushmita Sridhar <sup>1, 3</sup>, Tracey Swingler <sup>53</sup>, Julian Tang <sup>58</sup>, Graham P Taylor <sup>96</sup>, Theocharis Tsoleridis <sup>55</sup>, Lance Turtle <sup>46</sup>, Sarah

Walsh <sup>57</sup>, Michelle Wantoch <sup>86</sup>, Joanne Watts <sup>48</sup>, Sheila Waugh <sup>66</sup>, Sam Weeks<sup>41</sup>, Rebecca Williams<sup>31</sup>, Iona Willingham<sup>56</sup>, Emma L Wise <sup>25, 29, 31</sup>, Victoria Wright <sup>54</sup>, Sarah Wyllie <sup>70</sup>, and Jamie Young <sup>3</sup>.

### **Software and analysis tools**

Amy Gaskin<sup>33</sup>, Will Rowe <sup>15</sup>, and Igor Siveroni <sup>96</sup>.

### **Visualisation:**

Robert Johnson <sup>96</sup>.

### **Affiliations:**

**1** Wellcome Sanger Institute, **2** Public Health England, **3** University of Cambridge, **4** Health Data Research UK, Cambridge, **5** Public Health Agency, Northern Ireland, **6** Queen's University Belfast **7** Public Health England Colindale, **8** Department of Medicine, University of Cambridge, **9** University of Oxford, **10** Departments of Infectious Diseases and Microbiology, Cambridge University Hospitals NHS Foundation Trust; Cambridge, UK, **11** Division of Virology, Department of Pathology, University of Cambridge, **12** The Francis Crick Institute, **13** Cambridge Institute for Therapeutic Immunology and Infectious Disease, Department of Medicine, **14** Public Health England, Clinical Microbiology and Public Health Laboratory, Cambridge, UK, **15** Institute of Microbiology and Infection, University of Birmingham, **16** University of Birmingham, **17** Queen Elizabeth Hospital, **18** Heartlands Hospital, **19** University of Edinburgh, **20** NHS Lothian, **21** MRC-University of Glasgow Centre for Virus Research, **22** Institute of Biodiversity, Animal Health & Comparative Medicine, University of Glasgow, **23** West of Scotland Specialist Virology Centre, **24** Dept Zoology, University of Oxford, **25** University of Surrey, **26** Wellcome Centre for Human Genetics, Nuffield Department of Medicine, University of Oxford, **27** Big Data Institute, Nuffield Department of Medicine, University of Oxford, **28** Oxford University Hospitals NHS Foundation Trust, **29** Basingstoke Hospital, **30** Centre for Genomic Pathogen Surveillance, University of Oxford, **31** Hampshire Hospitals NHS Foundation Trust, **32** University of Southampton, **33** Public Health Wales NHS Trust, **34** Cardiff University, **35** Betsi Cadwaladr University Health Board, **36** Cardiff and Vale University Health Board, **37** Swansea University, **38** University of Sheffield, **39** Sheffield Teaching Hospitals, **40** Great Ormond Street NHS Foundation Trust, **41** University College London, **42** Oswaldo Cruz Institute, Rio de Janeiro **43** North West London Pathology, **44** Imperial College Healthcare NHS Trust, **45** NIHR Health Protection Research Unit in HCAI and AMR, Imperial College London, **46** University of Liverpool, **47** Manchester University NHS Foundation Trust, **48** Liverpool Clinical Laboratories, **49** University of Exeter, **50** Royal Devon and Exeter NHS Foundation Trust, **51** Quadram Institute Bioscience, University of East Anglia, **52** Norfolk and Norwich University Hospital, **53** University of East Anglia, **54** Deep Seq, School of Life Sciences, Queens Medical Centre, University of Nottingham, **55** Virology, School of Life Sciences, Queens Medical Centre, University of Nottingham, **56** Clinical Microbiology Department, Queens Medical Centre, **57** PathLinks, Northern Lincolnshire & Goole NHS Foundation Trust, **58** Clinical Microbiology, University Hospitals of Leicester NHS Trust, **59** Viapath, **60** Hub for Biotechnology in the Built Environment, Northumbria University, **61** NU-OMICS Northumbria University, **62** Northumbria University, **63** South Tees Hospitals NHS Foundation Trust, **64** North Cumbria Integrated Care NHS Foundation Trust, **65** North Tees and Hartlepool NHS Foundation Trust, **66** Newcastle

Hospitals NHS Foundation Trust, **67** County Durham and Darlington NHS Foundation Trust, **68** Centre for Enzyme Innovation, University of Portsmouth, **69** School of Biological Sciences, University of Portsmouth, **70** Portsmouth Hospitals NHS Trust, **71** University of Warwick, **72** University Hospitals Coventry and Warwickshire, **73** Warwick Medical School and Institute of Precision Diagnostics, Pathology, UHCW NHS Trust, **74** Genomics Innovation Unit, Guy's and St. Thomas' NHS Foundation Trust, **75** Centre for Clinical Infection & Diagnostics Research, St. Thomas' Hospital and Kings College London, **76** Department of Infectious Diseases, King's College London, **77** Guy's and St. Thomas' Hospitals NHS Foundation Trust, **78** Centre for Clinical Infection and Diagnostics Research, Department of Infectious Diseases, Guy's and St Thomas' NHS Foundation Trust, **79** Princess Alexandra Hospital Microbiology Dept. , **80** Cambridge University Hospitals NHS Foundation Trust, **81** East Kent Hospitals University NHS Foundation Trust, **82** University of Kent, **83** Gloucestershire Hospitals NHS Foundation Trust, **84** Department of Microbiology, Kettering General Hospital, **85** National Infection Service, PHE and Leeds Teaching Hospitals Trust, **86** Cambridge Stem Cell Institute, University of Cambridge, **87** Public Health Scotland, **88** Belfast Health & Social Care Trust, **89** Health Services Laboratories, **90** Barking, Havering and Redbridge University Hospitals NHS Trust, **91** Royal Free NHS Trust, **92** Maidstone and Tunbridge Wells NHS Trust, **93** University of Brighton, **94** Kings College London, **95** PHE Heartlands, **96** Imperial College London, **97** Department of Infection Biology, London School of Hygiene and Tropical Medicine.

## **Appendix 2 (SARS-CoV-2 Research Group, Zimbabwe)**

### **Samples acquisition and logistics:**

Kenneth Maeka<sup>1</sup>, Peter Gumbo<sup>1</sup>, Amini David<sup>1</sup>, Tariro Madamombe<sup>1</sup>, Lucy Sisya<sup>1</sup>, Shukusho D Fungai<sup>1</sup>, Mercy Marumure<sup>1</sup>, Admire Bwagirire<sup>1</sup>, Florence Malunga<sup>1</sup>, Norah Sukutayi-Vere<sup>1</sup>, Takudzwa Kawome<sup>1</sup>, Stanford Mupandasekwa<sup>1</sup>, Tanaka Sakubani<sup>1</sup>, Exavier Mazarura<sup>1</sup>, Babra Murwira<sup>2</sup>, Monalisa Mutimutema<sup>2</sup>, Joshua Mbanga<sup>3</sup>, Zephania Dhlamini<sup>3</sup>, Aleck Maunganidze<sup>3</sup>, Anita Dube<sup>3</sup>, Beauty Makamure<sup>4</sup>, Justin Mayini<sup>4</sup>, Tendai Washaya<sup>4</sup>, Janice Martins<sup>4</sup>, Isabel Mashita<sup>4</sup>, Happiness Mahove<sup>4</sup>, Norah Karonga<sup>4</sup>, Forget Makoga<sup>4</sup>, Learnmore Chawira<sup>5</sup>, Emmaculate Govore<sup>5</sup>, Chipso Berejena<sup>6</sup>, Arnold Mukaratirwa<sup>6</sup>, John Macharaga<sup>7</sup>, Samson Chomunacho<sup>7</sup>, Simbarashe Mapurisa<sup>7</sup>, Albert Mudungwe<sup>7</sup>, Davison Makwarimba<sup>7</sup>, Raymond Ncube<sup>7</sup>, Beverley Chinembiri<sup>7</sup>, Godfrey Mhondiwa<sup>7</sup>, Nelia Kativu<sup>7</sup>, Rutendo Muchemwa<sup>7</sup> and Everlyn Choto<sup>7</sup>.

### **Affiliations:**

**1** National Microbiology Reference Laboratory, Ministry of Health and Child Care, Zimbabwe , P.O. Box ST 749, Southerton, Harare, Zimbabwe, **2** National TB Reference Laboratory, Bulawayo, **3** National University of Science and Technology, Bulawayo, **4** Biomedical Research and Training Institute, **5** Harare City Health Department, Beatrice Road Infectious Diseases Hospital, Harare, Zimbabwe, **6** National Virology Laboratory, Harare, Zimbabwe, **7** Sally Mugabe Central Hospital, Harare, Zimbabwe
